# Supplementary material
Source: PubMed Central journal article supplement (PMC7720400)
Supplement: 12889_2020_9972_MOESM1_ESM.pdf [file 12889_2020_9972_MOESM1_ESM.pdf]

# Supplementary Material for “Hindsight is 2020 vision: a characterisation of the global response to the COVID-19 pandemic”

David J. Warne<sup>1,2</sup>, Anthony Ebert<sup>3</sup>, Christopher Drovandi<sup>1,2</sup>,  
Wenbiao Hu<sup>4</sup>, Antonietta Mira<sup>3,5</sup>, and Kerrie Mengersen<sup>1,2</sup>

<sup>1</sup>School of Mathematical Sciences, Science and Engineering Faculty,  
Queensland University of Technology, Brisbane, Australia

<sup>2</sup>Australian Research Council Centre of Excellence for Mathematical and  
Statistical Frontiers

<sup>3</sup>Institute of Computational Science, Università della Svizzera italiana,  
Lugano, Switzerland

<sup>4</sup>School of Public Health and Social Work, Institute of Health and  
Biomedical Innovation, Queensland University of Technology, Brisbane,  
Australia

<sup>5</sup>Dipartimento di Scienza e Alta Tecnologia, Università dell’Insubria,  
Varese, Italy

November 20, 2020

## Contents

|                                                              |           |
|--------------------------------------------------------------|-----------|
| <b>Appendix A Stochastic model details</b>                   | <b>2</b>  |
| A.1 Model formulation . . . . .                              | 2         |
| A.2 Approximate stochastic simulation . . . . .              | 2         |
| <b>Appendix B Bayesian analysis</b>                          | <b>4</b>  |
| B.1 Approximate Bayesian computation . . . . .               | 4         |
| B.2 Sequential Monte Carlo sampling . . . . .                | 4         |
| B.3 Point estimate computation . . . . .                     | 6         |
| <b>Appendix C Marginal posterior comparisons</b>             | <b>7</b>  |
| <b>Appendix D Example posterior predictive distributions</b> | <b>17</b> |
| <b>Appendix E Sensitivity analysis</b>                       | <b>28</b> |

# Appendix A Stochastic model details

In the main manuscript, we present our model as a nonlinear system of ordinary differential equations (ODEs) for ease of discourse. Due the variability in daily reported cases, however, it is important to take into account stochasticity in our analysis.

## A.1 Model formulation

We implement our model as a stochastic compartmental epidemiological model consisting of the compartments,  $S$  (susceptible),  $I$  (undocumented infected),  $A$  (confirmed active),  $R$  (confirmed recovered),  $D$  (confirmed death), and  $R^u$  (undocumented recovered). Transition events between compartments are

$$\mathcal{E}_1 : S \rightarrow I, \quad \mathcal{E}_2 : I \rightarrow A, \quad \mathcal{E}_3 : A \rightarrow R, \quad \mathcal{E}_4 : A \rightarrow D, \quad \text{and} \quad \mathcal{E}_5 : I \rightarrow R^u.$$

Let  $\mathbf{X}_t = [S_t, I_t, A_t, R_t, D_t, R_t^u]^T$  be the state vector of sub-population counts at time  $t > 0$ , and assume a well-mixed population of size  $P$ . Conditional on the state  $\mathbf{X}_t$ , the waiting time to the next occurrence of event  $\mathcal{E}_j$  is assumed to be exponentially distributed with rate parameter  $h_j(\mathbf{X}_t)$ , where  $h_j(\mathbf{X}_t)$  is the hazard function for  $\mathcal{E}_j$ . The hazard functions can be interpreted as the instantaneous rate of events conditional on the current state.

The hazard functions of our model are:

$$h_1(\mathbf{X}_t) = \left( \alpha_0 + \frac{\alpha}{1 + U(A_t, R_t, D_t)^n} \right) \frac{S_t I_t}{P}, \quad h_2(\mathbf{X}_t) = \gamma I_t, \\ h_3(\mathbf{X}_t) = \beta A_t, \quad h_4(\mathbf{X}_t) = \delta A_t, \quad \text{and} \quad h_5(\mathbf{X}_t) = \eta \beta I_t,$$

where  $U(A, R, D) = w_A A_t + w_R R_t + w_D D_t$  is the reporting function of observables with weights  $w_A > 0$ ,  $w_R > 0$  and  $w_D > 0$ . Model parameters related to the event rates are the transmission rates  $\alpha_0 > 0$ ,  $\alpha > 0$ , the response slope  $n \geq 0$ , identification rate  $\gamma > 0$ , case recovery rate  $\beta > 0$ , case fatality rate  $\delta > 0$ , and the latent recovery rate scale factor  $\eta > 0$ .

Should event  $j$  occur, the state vector is updated by adding the state change vector  $\nu_j$ . For our model we have,  $\nu_1 = [-1, 1, 0, 0, 0, 0]^T$ ,  $\nu_2 = [0, -1, 1, 0, 0, 0]^T$ ,  $\nu_3 = [0, 0, -1, 1, 0, 0]^T$ ,  $\nu_4 = [0, 0, -1, 0, 1, 0]^T$ , and  $\nu_5 = [0, -1, 0, 0, 0, 1]^T$ . The resulting stochastic process,  $\{\mathbf{X}_t\}_{t \geq 0}$ , is a discrete-state, continuous-time Markov process that can be described by the Kurtz random time-change representation [6],

$$\mathbf{X}_t = \mathbf{X}_0 + \sum_{j=1}^5 Y_j \left( \int_0^t h_j(\mathbf{X}_s) ds \right) \nu_j,$$

where  $\mathbf{X}_0$  is the initial state vector,  $\nu_j$  is the state change that occurs under event  $j$ , and  $Y_j(\cdot)$  is an inhomogeneous Poisson process for event  $j$ .

## A.2 Approximate stochastic simulation

While exact realisations of this process can be generated using event-based simulation [3, 4], this is prohibitive within an approximate Bayesian computational setting with large

population sizes and event numbers. Therefore, we apply a first order approximation to the integral over the interval  $[t, t + \tau)$  to obtain the tau-leaping approximation [5],

$$\mathbf{X}_{t+\tau} = \mathbf{X}_t + \sum_{j=1}^5 Y_j \boldsymbol{\nu}_j + \mathcal{O}(\tau),$$

where  $Y_j \sim \text{Poisson}(h_j(\mathbf{X}_t)\tau)$  counts the number of times event  $j$  occurs in the interval  $[t, t + \tau)$ . Simulations proceed as per Algorithm 1. For our simulations we use  $\tau = 1$  (days), and initial condition  $\mathbf{X}_0 = [P - \kappa A_0 - (A_0 + R_0 + D_0), \kappa A_0, A_0, R_0, D_0, 0]^T$ , where  $A_0, R_0$  and  $D_0$  come from the Johns Hopkins University COVID-19 data, and  $\kappa$  is the relative number of unobserved cases at  $t = 0$ .

---

**Algorithm 1** Tau-leaping approximate stochastic simulation method

---

```

1: Initialise  $t \leftarrow 0$ ;  $\mathbf{X}_0 \leftarrow [P - \kappa A_0 - (A_0 + R_0 + D_0), \kappa A_0, A_0, R_0, D_0, 0]^T$ ;
2: while  $t + \tau < T$  do
3:   for  $j \in \{1, 2, \dots, 5\}$  do
4:      $Y_j \sim \text{Poisson}(h_j(\mathbf{X}_t)\tau)$ ;
5:   end for
6:   for  $j \in \{1, 2, \dots, 5\}$  do
7:      $\mathbf{X}_{t+\tau} \leftarrow \mathbf{X}_t + Y_j \boldsymbol{\nu}_j$ 
8:   end for
9:    $t \leftarrow t + \tau$ ;
10: end while

```

---

## Appendix B Bayesian analysis

We apply Bayesian inference to quantify uncertainty in the model parameters associated with event rates and community response,  $\theta = [\alpha_0, \alpha, \beta, \gamma, \delta, \eta, n, \kappa, w_A, w_R, w_D]$ , for country  $i$  using Johns Hopkins University data  $\mathcal{D}_i = [\{C_{t,i}, R_{t,i}, D_{t,i}\}_{T \geq t \geq 0}]$ . The task is to sample the posterior distribution with probability density given by Bayes' Theorem,

$$p(\theta | \mathcal{D}_i) = \frac{p(\mathcal{D}_i | \theta)p(\theta)}{p(\mathcal{D}_i)},$$

where  $p(\theta)$  is the prior,  $p(\mathcal{D}_i | \theta)$  is the likelihood and  $p(\mathcal{D}_i)$  is the evidence. For the remainder of this section, we omit the country index  $i$  for notational convenience.

### B.1 Approximate Bayesian computation

For our model, the likelihood function can be written in terms of the solution to the forwards Kolmogorov equation, however, this requires large matrix exponentials to evaluate. Furthermore, since the full model state vector is only partially observable, the data model is no longer Markovian and is therefore computationally intractable. To deal with this likelihood intractability, we apply approximate Bayesian computation (ABC) [8–10], that samples from an approximation to the posterior for each country,

$$\begin{aligned} p(\theta | \mathcal{D}) &\approx p(\theta | \rho(\mathcal{D}, \mathcal{D}_s) \leq \epsilon) \propto \mathbb{P}(\rho(\mathcal{D}, \mathcal{D}_s) \leq \epsilon | \theta)p(\theta) \\ &= p(\theta) \int \mathbb{1}_{(0, \epsilon]}(\rho(\mathcal{D}, \mathcal{D}_s)) s(\mathcal{D}_s | \theta) d\mathcal{D}_s, \end{aligned}$$

where  $\mathcal{D}$  is the COVID-19 data for the country of interest,  $\mathcal{D}_s \sim s(\cdot | \theta)$  is simulated data,  $\rho(\mathcal{D}, \mathcal{D}_s)$  is a discrepancy metric,  $\epsilon$  is the discrepancy threshold and  $\mathbb{1}_{(0, \epsilon]}(\rho(\mathcal{D}, \mathcal{D}_s)) = 1$  if  $\rho(\mathcal{D}, \mathcal{D}_s) \leq \epsilon$ , and  $\mathbb{1}_{(0, \epsilon]}(\rho(\mathcal{D}, \mathcal{D}_s)) = 0$  otherwise. For our implementation, we apply the discrepancy metric,

$$\rho(\mathcal{D}, \mathcal{D}_s) = \left( \sum_{t=1}^{T_d} (A_t - A_{t,s})^2 + (R_t - R_{t,s})^2 + (D_t - D_{t,s})^2 \right)^{1/2}$$

where  $\mathcal{D} = [\{A_t, R_t, D_t\}_{t \geq 0}]$  is the data and  $\mathcal{D}_s = [\{A_{t,s}, R_{t,s}, D_{t,s}\}_{t \geq 0}]$  is simulated data.

### B.2 Sequential Monte Carlo sampling

We apply a sequential Monte Carlo (SMC) scheme [1, 7] to move an initial set of  $N_p$  samples from the prior through a sequence of ABC approximations defined by a decreasing sequence of  $T$  discrepancy thresholds,  $\epsilon_1 > \epsilon_2 > \dots > \epsilon_T = \epsilon$ . Our particular implementation (Algorithm 2), based on the work of Drovandi and Pettit [2], adaptively selects the acceptance thresholds and utilises MCMC steps using tuned Gaussian random walk proposals. For all model calibrations we apply adaptive SMC with  $N_p = 2000$  particles, tuning parameters  $c = 0.01$  and terminate sampling when the MCMC acceptance probably  $p_{acc}$  drops below  $p_{min} = 0.001$ .



---

**Algorithm 2** Adaptive SMC sampler for approximate Bayesian computation

---

```
1: Initialise  $N_a = aN_p$ ,  $N_\ell = N_p - N_a$ 
2: for  $j \in [1, 2, \dots, N_p]$  do
3:   Sample prior,  $\theta^* \sim p(\cdot)$  and simulate model,  $\mathcal{D}_s \sim s(\cdot | \theta^*)$ ;
4:   Set  $\rho_j \leftarrow \rho(\mathcal{D}, \mathcal{D}_s)$ ;
5: end for
6: repeat
7:   Sort particles  $\{(\theta_j, \rho_j)\}_{j=1}^{N_p}$ , such that  $\rho_j \leq \rho_{j+1}$  for all  $j \in [1, 2, \dots, N_p - 1]$ ;
8:   Remove particles  $\{(\theta_j, \rho_j)\}_{j=N_\ell+1}^{N_p}$  an set  $\epsilon \leftarrow \rho_{N_\ell}$ ;
9:   Resample particles  $\{\theta_j\}_{j=N_\ell+1}^{N_p}$  from  $\{(\theta_j)\}_{j=1}^{N_\ell}$  with replacement;
10:  Estimate sample covariance,  $\hat{\Sigma}$ , of particles  $\{\theta_j\}_{j=1}^{N_p}$ .
11:  Adapt proposal kernel  $q(u | v) = \phi\left(u; v, \frac{2.38}{\dim(\boldsymbol{\theta})} \hat{\Sigma}\right)$ , where  $\phi(\cdot; \mu, \Sigma)$  is a multi-
    variate Gaussian density function and  $\dim(\boldsymbol{\theta})$  is the number of parameters;
12:  Set  $p_{\text{acc}} \leftarrow 0$ ;
13:  for  $j \in [N_\ell + 1, N_\ell + 2, \dots, N_p]$  do
14:    for  $k \in [1, 2, \dots, R_{\text{trial}}]$  do
15:      Generate proposal,  $\theta^* \sim q(\cdot | \theta_j)$  and sample  $u \sim \mathcal{U}(0, 1)$ ;
16:      if  $u \leq \min\left(1, \frac{p(\theta^*)q(\theta_j | \theta^*)}{p(\theta_j)q(\theta^* | \theta_j)}\right)$  then
17:        Simulate model  $\mathcal{D}_s \sim s(\cdot | \theta^*)$ ;
18:        if  $\rho(\mathcal{D}_i, \mathcal{D}_s) \leq \epsilon$  then
19:          Set  $\theta_j \leftarrow \theta^*$ ,  $\rho_j \leftarrow \rho(\mathcal{D}_i, \mathcal{D}_s)$ , and  $p_{\text{acc}} \leftarrow p_{\text{acc}} + (R_{\text{trial}}N_a)^{-1}$ ;
20:        end if
21:      end if
22:    end for
23:  end for
24:  Set  $R \leftarrow \log c / \log(1 - p_{\text{acc}})$ ;
25:  for  $j \in [N_\ell + 1, N_\ell + 2, \dots, N_p]$  do
26:    for  $k \in [1, 2, \dots, R - R_{\text{trial}}]$  do
27:      Generate proposal,  $\theta^* \sim q(\cdot | \theta_j)$  and sample  $u \sim \mathcal{U}(0, 1)$ ;
28:      if  $u \leq \min\left(1, \frac{p(\theta^*)q(\theta_j | \theta^*)}{p(\theta_j)q(\theta^* | \theta_j)}\right)$  then
29:        Simulate model  $\mathcal{D}_s \sim s(\cdot | \theta^*)$ ;
30:        if  $\rho(\mathcal{D}_i, \mathcal{D}_s) \leq \epsilon$  then
31:          Set  $\theta_j \leftarrow \theta^*$ ,  $\rho_j \leftarrow \rho(\mathcal{D}_i, \mathcal{D}_s)$ , and  $p_{\text{acc}} \leftarrow p_{\text{acc}} + (RN_a)^{-1}$ ;
32:        end if
33:      end if
34:    end for
35:  end for
36: until  $p_{\text{acc}} < p_{\text{min}}$ 
```

---

### B.3 Point estimate computation

Given a set of particles,  $\{\theta_j\}_{j=1}^{N_p}$ , from the ABC posterior generated from the SMC sampler, we require a point estimate for each parameter to compare overall trends between countries. We found the posterior means often did not result in a posterior predictive distribution that was representative of the data for most countries.

Instead we take the ABC posterior particle that has the smallest average discrepancy with the data. That is, for country  $i$ , the point estimate as

$$\hat{\theta}_i = \operatorname{argmin}_{\theta \in \{\theta_j\}_{j=1}^{N_p}} \int \rho(\mathcal{D}_i, \mathcal{D}_s) s(\mathcal{D}_s | \theta) d\mathcal{D}_s.$$

We evaluate this through direct Monte Carlo (Algorithm 3) using  $M = 100$  simulations per particle.

---

**Algorithm 3** Monte Carlo method for computing point estimates

---

- 1: Give data  $\mathcal{D}_i$  and ABC posterior samples  $\{\theta_j\}_{j=1}^{N_p}$  generated by SMC (Algorithm 2);
  - 2: Set  $\bar{\rho}_{\min} \leftarrow \infty$ ;
  - 3: **for**  $j \in \{1, 2, \dots, N_p\}$  **do**
  - 4:     Generate simulations  $\mathcal{D}_s^{(1)}, \mathcal{D}_s^{(2)}, \dots, \mathcal{D}_s^{(M)} \sim s(\mathcal{D}_s | \theta_j)$ ;
  - 5:     Set  $\bar{\rho} \leftarrow \frac{1}{M} \sum_{k=1}^M \rho(\mathcal{D}_i, \mathcal{D}_s^{(k)})$ ;
  - 6:     **if**  $\bar{\rho} < \bar{\rho}_{\min}$  **then**
  - 7:         Set  $\bar{\rho}_{\min} \leftarrow \bar{\rho}$  and  $\hat{\theta}_i \leftarrow \theta_j$
  - 8:     **end if**
  - 9: **end for**
-

## Appendix C Marginal posterior comparisons

This section includes box-plots for comparison of marginal posterior distributions across countries for the model parameters  $\theta = [\alpha_0, \alpha, \beta, \gamma, \eta, n, \kappa, w_A]$ . Results for the first analysis period (22 January–30 March) are given the Fig. 1–3, results for the second analysis period (22 January–13 April) are given the Fig. 4–6, and results for the third analysis period (22 January–9 June) are given the Fig. 7–9. For reference, Table 1 provides the ISO-3166 alpha3 codes for each country.

Table 1: Lookup table of Country names by ISO-3166 alpha3 codes

| Country Code | Country Name           | Country Code | Country Name    |
|--------------|------------------------|--------------|-----------------|
| AFG          | Afghanistan            | JPN          | Japan           |
| ALB          | Albania                | KAZ          | Kazakhstan      |
| AND          | Andorra                | KHM          | Cambodia        |
| ARE          | United Arab Emirates   | KOR          | South Korea     |
| ARG          | Argentina              | KWT          | Kuwait          |
| ARM          | Armenia                | LBN          | Lebanon         |
| AUS          | Australia              | LKA          | Sri Lanka       |
| AUT          | Austria                | LTU          | Lithuania       |
| AZE          | Azerbaijan             | LUX          | Luxembourg      |
| BEL          | Belgium                | LVA          | Latvia          |
| BFA          | Burkina Faso           | MAR          | Morocco         |
| BGR          | Bangladesh             | MDA          | Moldova         |
| BHR          | Bahrain                | MEX          | Mexico          |
| BIH          | Bosnia and Herzegovina | MKD          | North Macedonia |
| BRA          | Brazil                 | MLT          | Malta           |
| BRN          | Brunei                 | MUS          | Mauritius       |
| CAN          | Canada                 | MYS          | Malaysia        |
| CHE          | Switzerland            | NGA          | Nigeria         |
| CHL          | Chile                  | NLD          | Netherlands     |
| CHN          | China                  | NOR          | Norway          |
| CIV          | Cote d'Ivoire          | NZL          | New Zealand     |
| CMR          | Cameroon               | OMN          | Oman            |
| COL          | Columbia               | PAK          | Pakistan        |
| CRI          | Costa Rica             | PAN          | Panama          |
| CUB          | Cuba                   | PER          | Peru            |
| CYP          | Cyprus                 | PHL          | Philippines     |
| CZE          | Czechia                | POL          | Poland          |
| DEU          | Germany                | PRT          | Portugal        |
| DNK          | Denmark                | PSE          | Palestine       |
| DOM          | Dominican Republic     | QAT          | Qatar           |
| DZA          | Algeria                | ROU          | Romania         |
| ECU          | Ecuador                | RUS          | Russia          |
| EGY          | Egypt                  | SAU          | Saudi Arabia    |
| ESP          | Spain                  | SEN          | Senegal         |
| EST          | Estonia                | SGP          | Singapore       |
| FIN          | Finland                | SMR          | San Marino      |
| FRA          | France                 | SRB          | Serbia          |
| GBR          | United Kingdom         | SVK          | Slovakia        |
| GHA          | Ghana                  | SVN          | Slovenia        |
| GRC          | Greece                 | SWE          | Sweden          |
| HND          | Honduras               | THA          | Thailand        |
| HRV          | Croatia                | TUN          | Tunisia         |
| HUN          | Hungary                | TUR          | Turkey          |
| IDN          | Indonesia              | TWN          | Taiwan          |
| IND          | India                  | UKR          | Ukraine         |
| IRL          | Republic of Ireland    | URY          | Uruguay         |
| IRN          | Iran                   | USA          | United States   |
| IRQ          | Iraq                   | UZB          | Uzbekistan      |
| ISL          | Iceland                | VEN          | Venezuela       |
| ISR          | Israel                 | VNM          | Vietnam         |
| ITA          | Italy                  | ZAF          | South Africa    |
| JOR          | Jordan                 |              |                 |

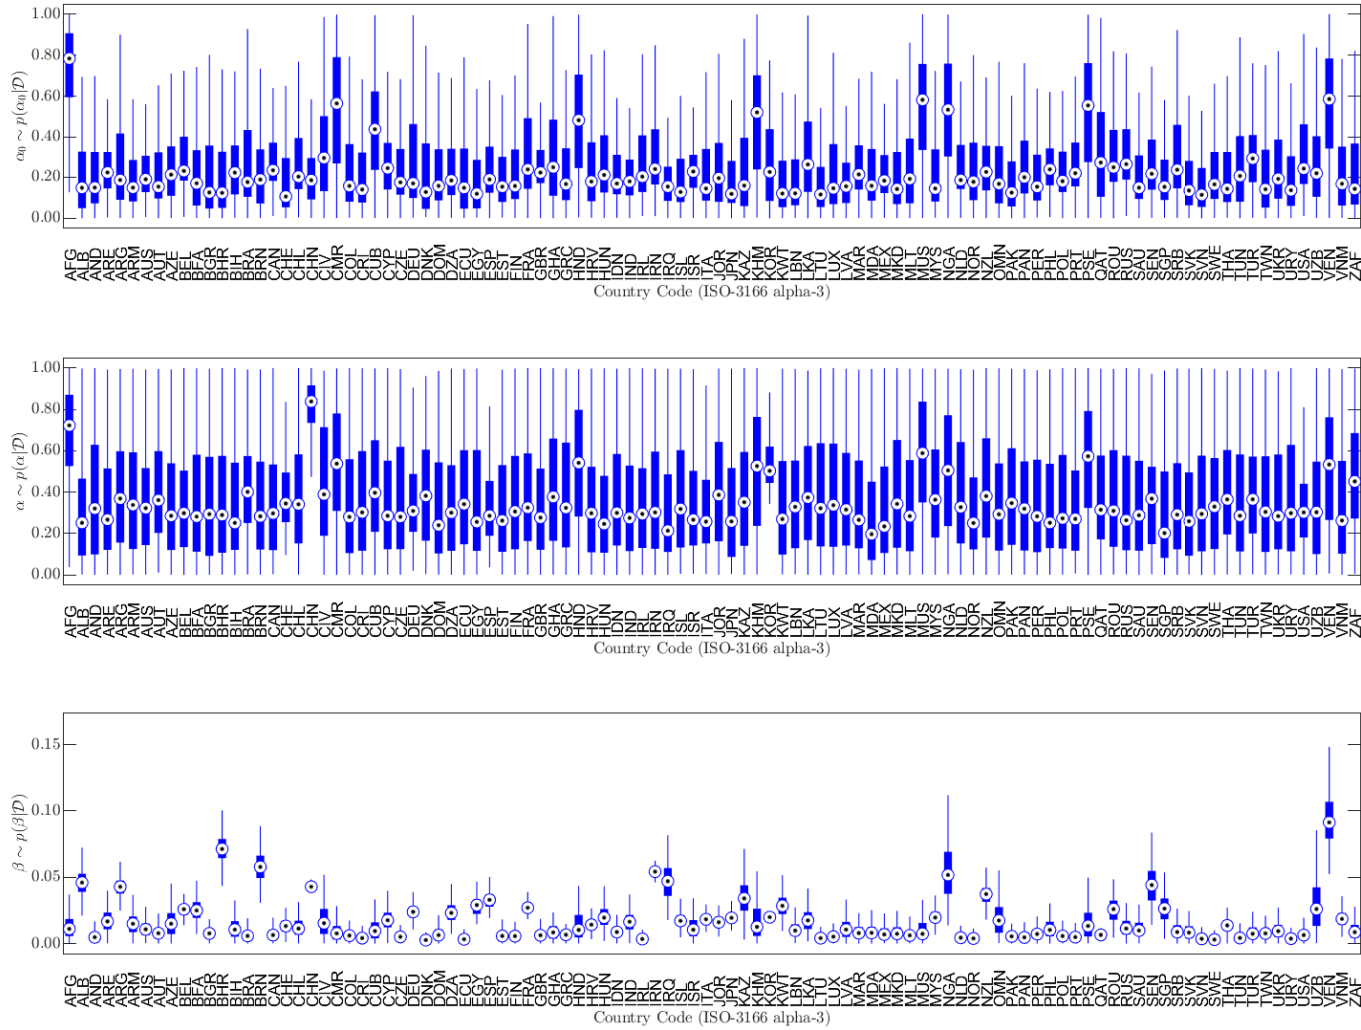

Figure 1: Box plots comparing marginal posterior distributions by country over the period 22 January–30 March 2020 for parameters  $\alpha_0$  (top),  $\alpha$ , and  $\beta$  (bottom).

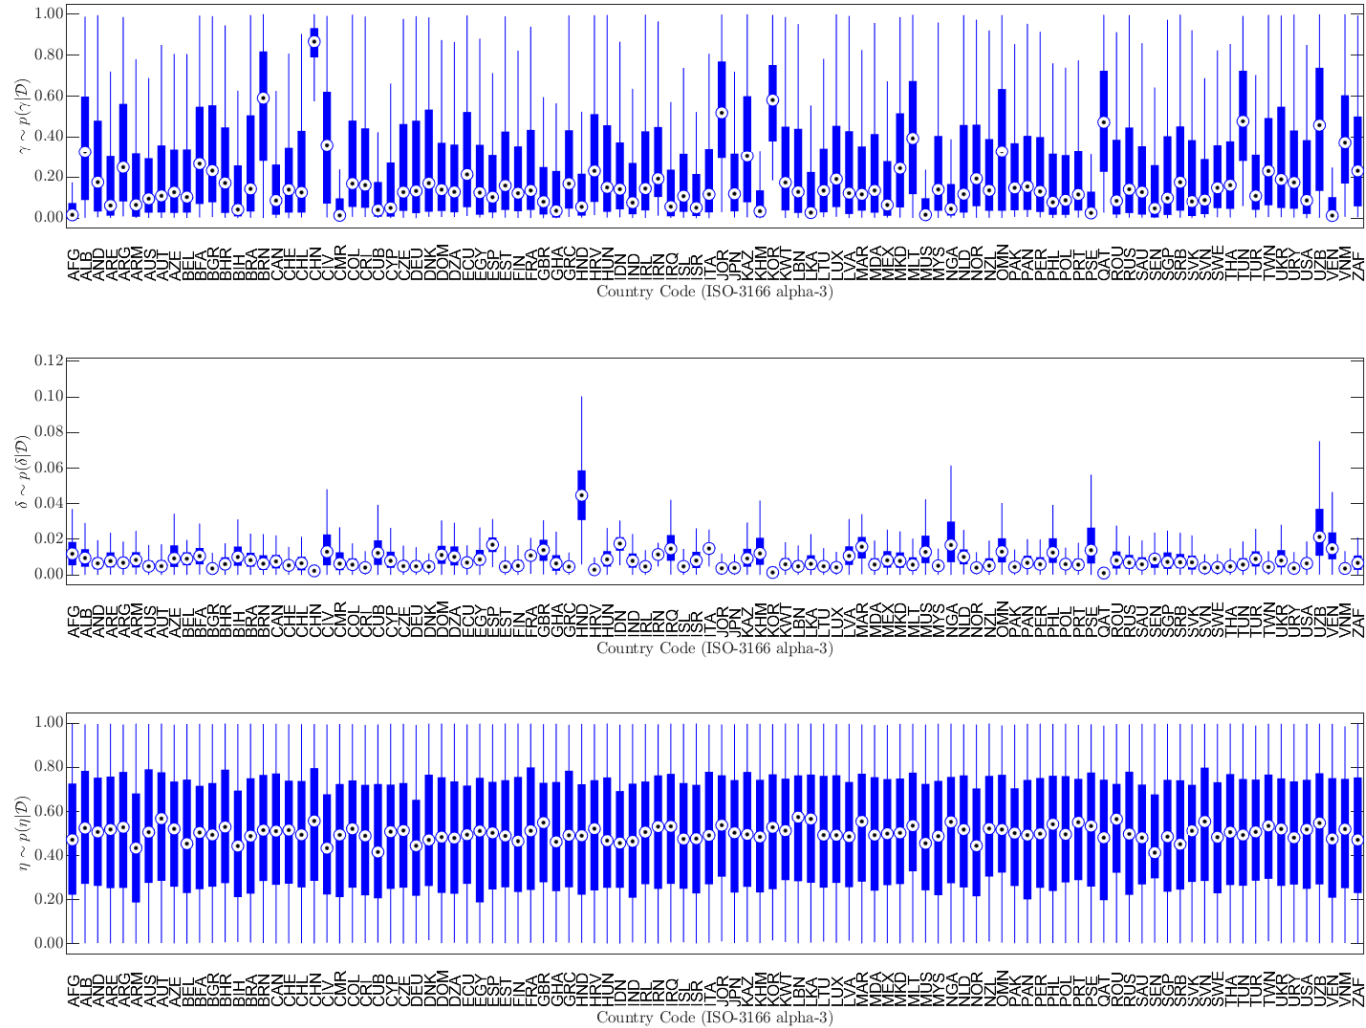

Figure 2: Box plots comparing marginal posterior distributions by country over the period 22 January–30 March 2020 for parameters  $\gamma$  (top),  $\delta$ , and  $\eta$  (bottom).

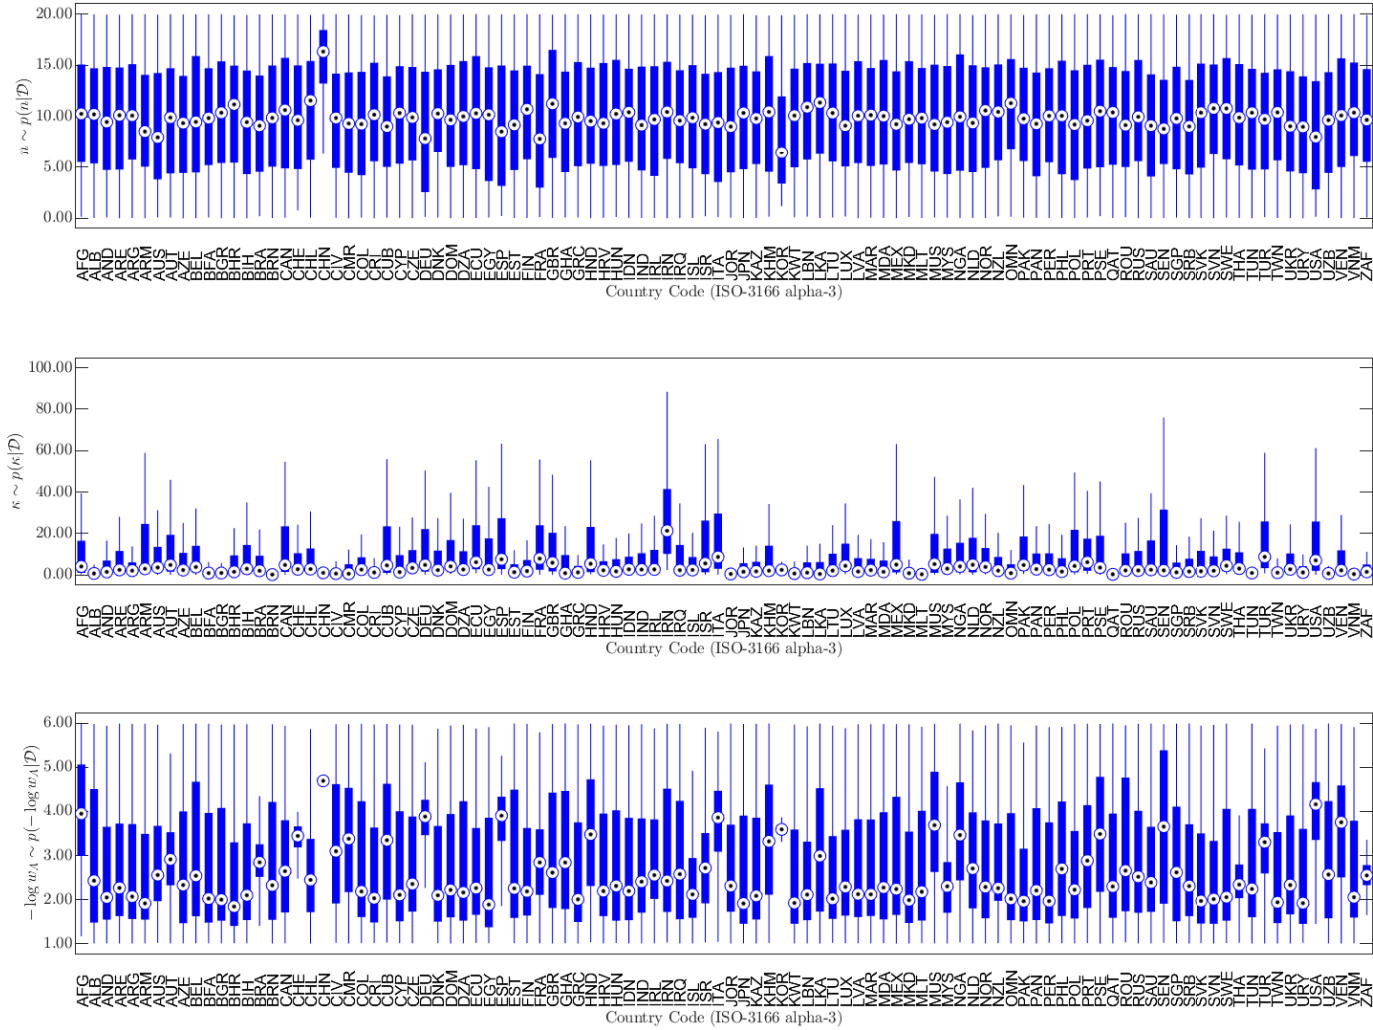

Figure 3: Box plots comparing marginal posterior distributions by country over the period 22 January–30 March 2020 for parameters  $n$  (top),  $\kappa$ , and  $-\log_{10} w_A$  (bottom).

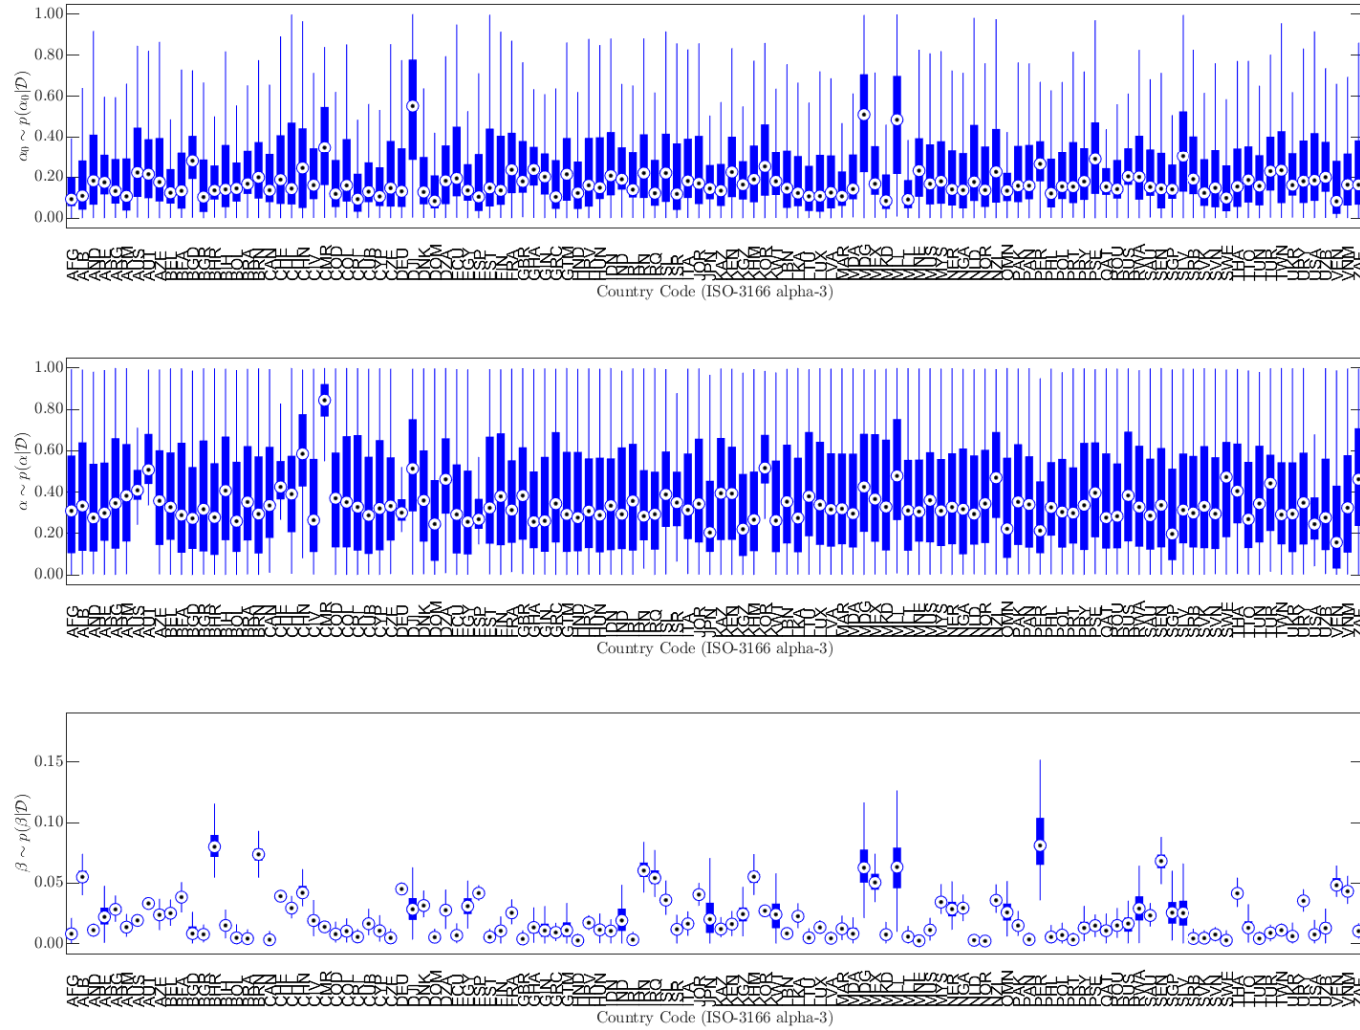

Figure 4: Box plots comparing marginal posterior distributions by country over the period 22 January–13 April 2020 for parameters  $\alpha_0$  (top),  $\alpha$ , and  $\beta$  (bottom).

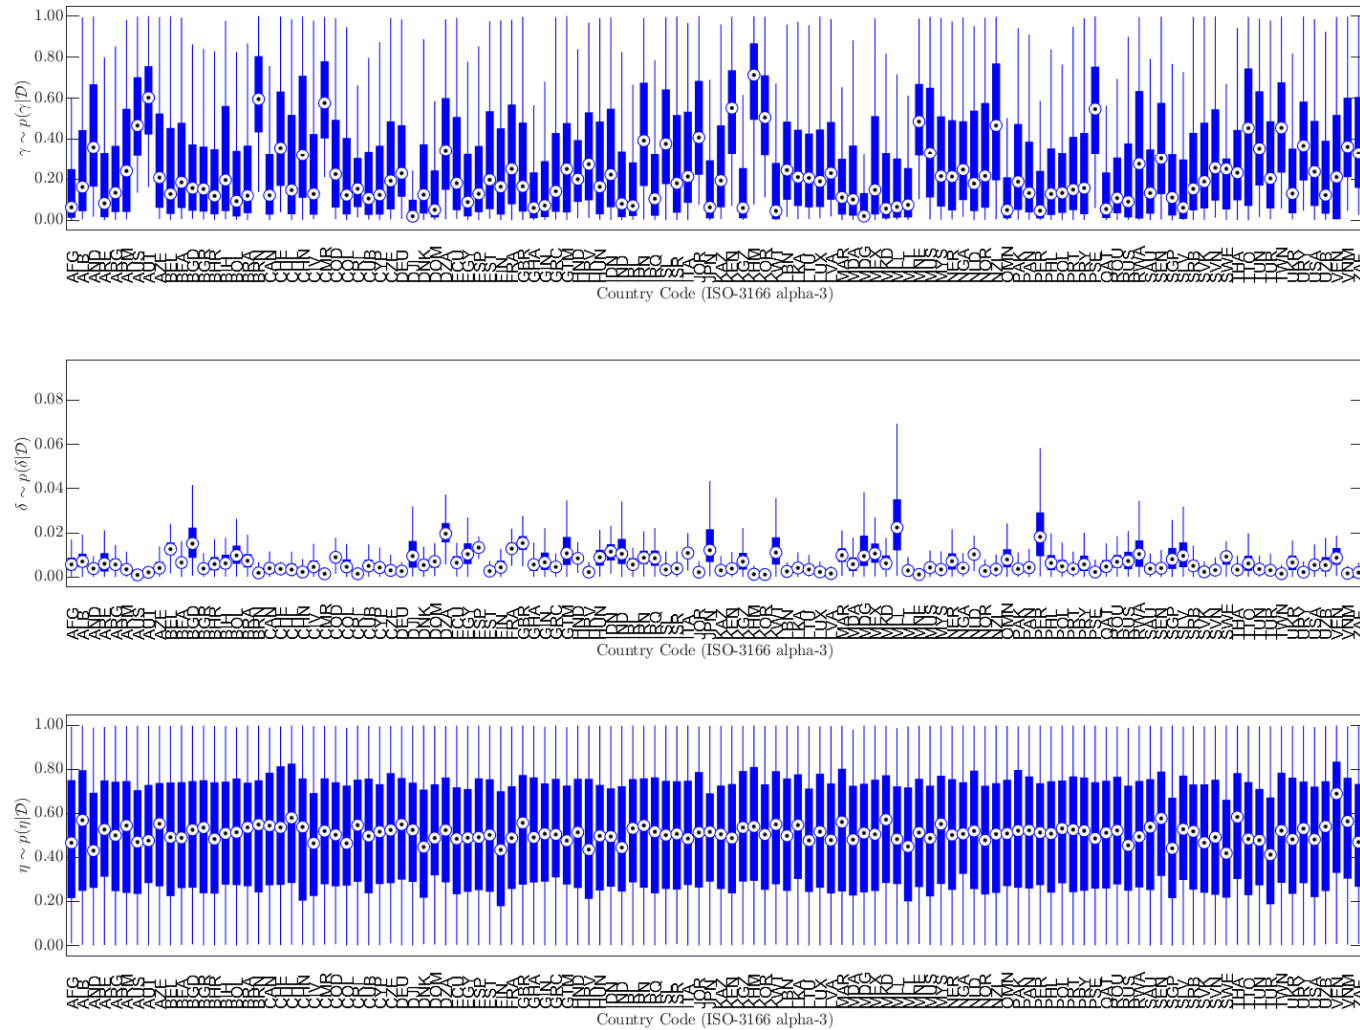

Figure 5: Box plots comparing marginal posterior distributions by country over the period 22 January–13 April 2020 for parameters  $\gamma$  (top),  $\delta$ , and  $\eta$  (bottom).



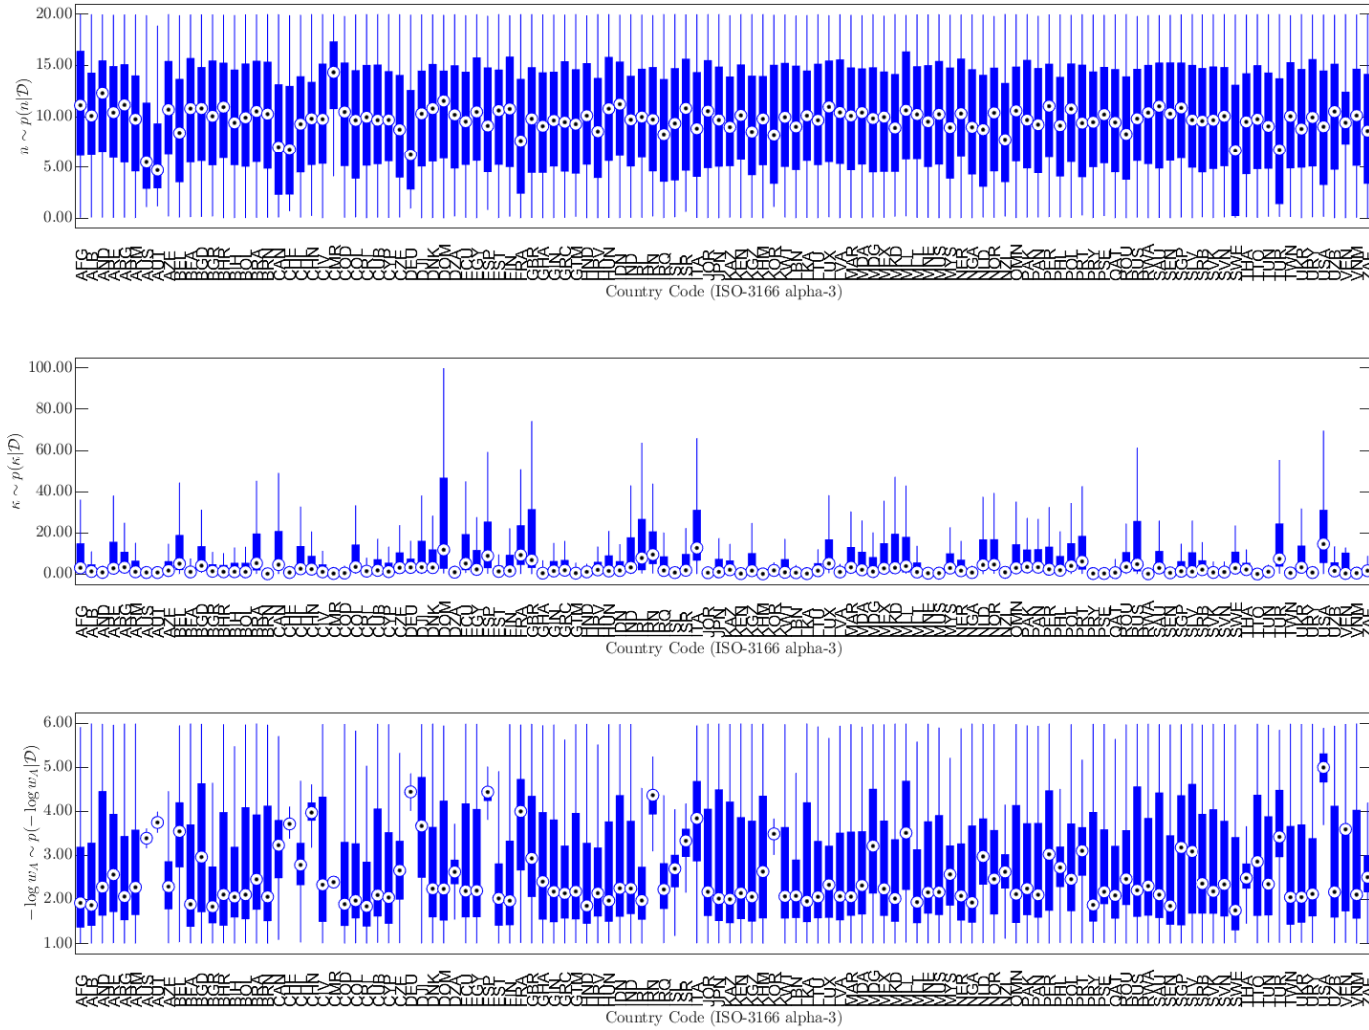

Figure 6: Box plots comparing marginal posterior distributions by country over the period 22 January–13 April 2020 for parameters  $n$  (top),  $\kappa$ , and  $-\log_{10} w_A$  (bottom).

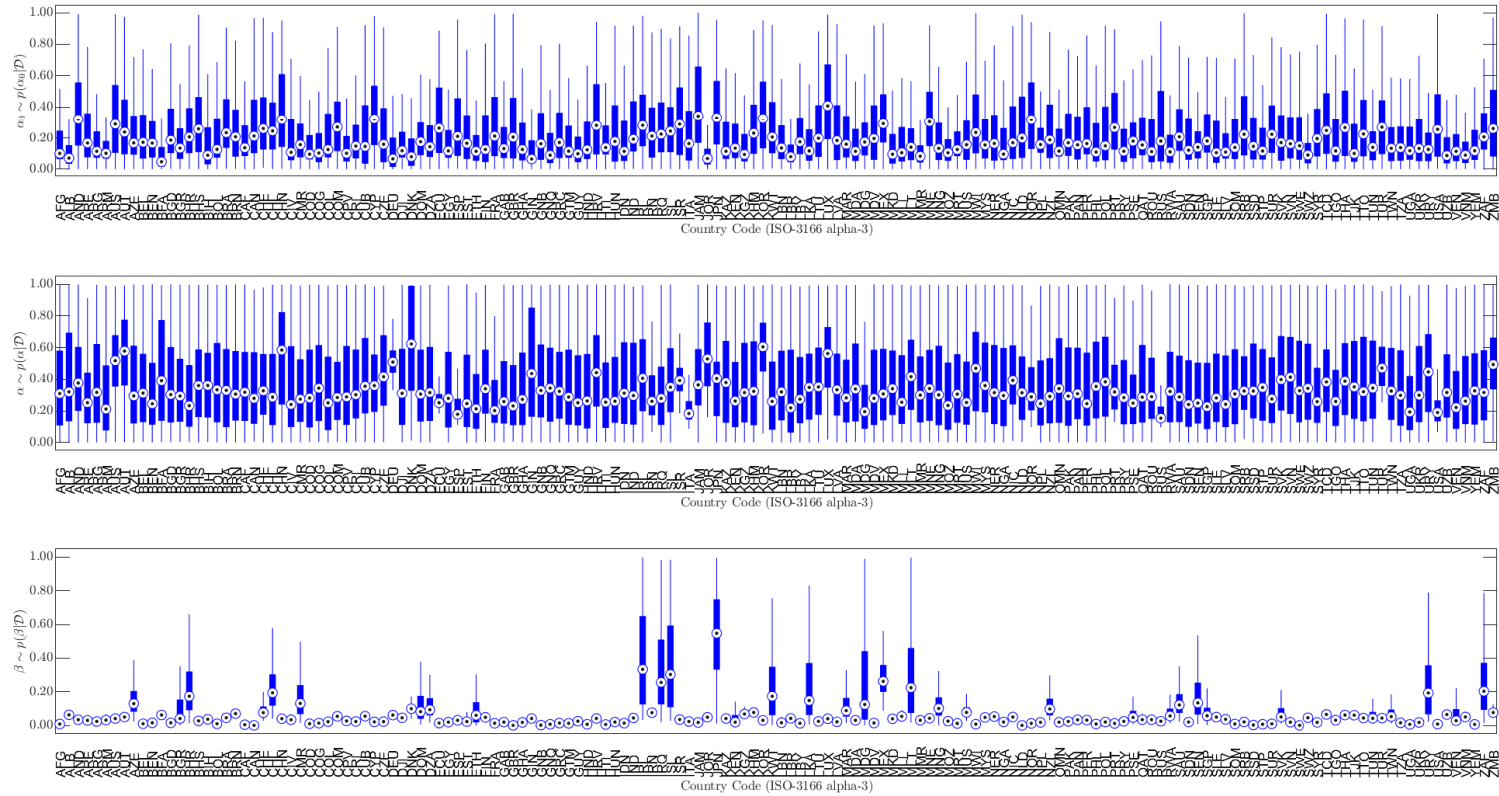

Figure 7: Box plots comparing marginal posterior distributions by country over the period 22 January–9 June 2020 for parameters  $\alpha_0$  (top),  $\alpha$ , and  $\beta$  (bottom).

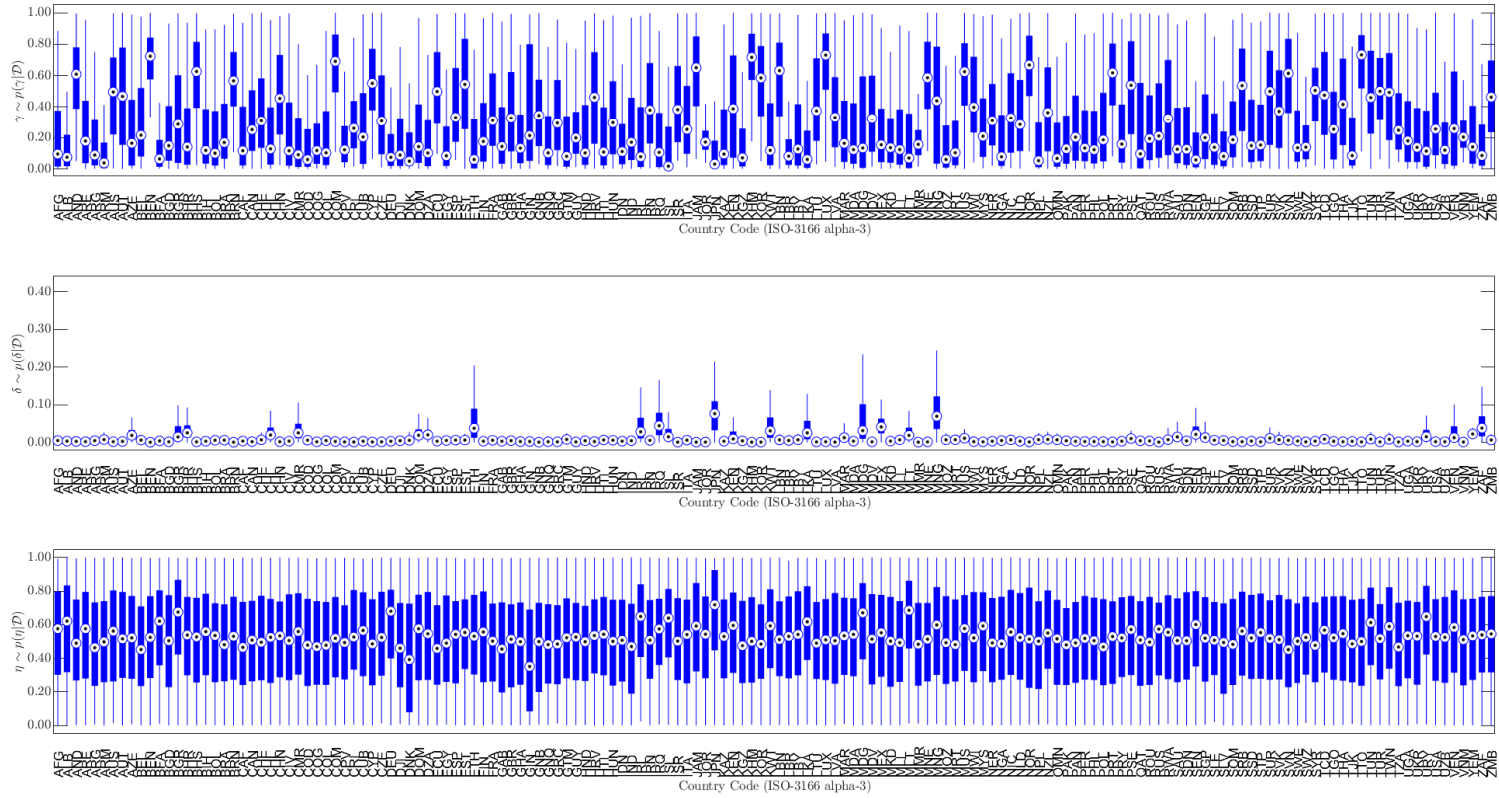

Figure 8: Box plots comparing marginal posterior distributions by country over the period 22 January–9 June 2020 for parameters  $\gamma$  (top),  $\delta$ , and  $\eta$  (bottom).

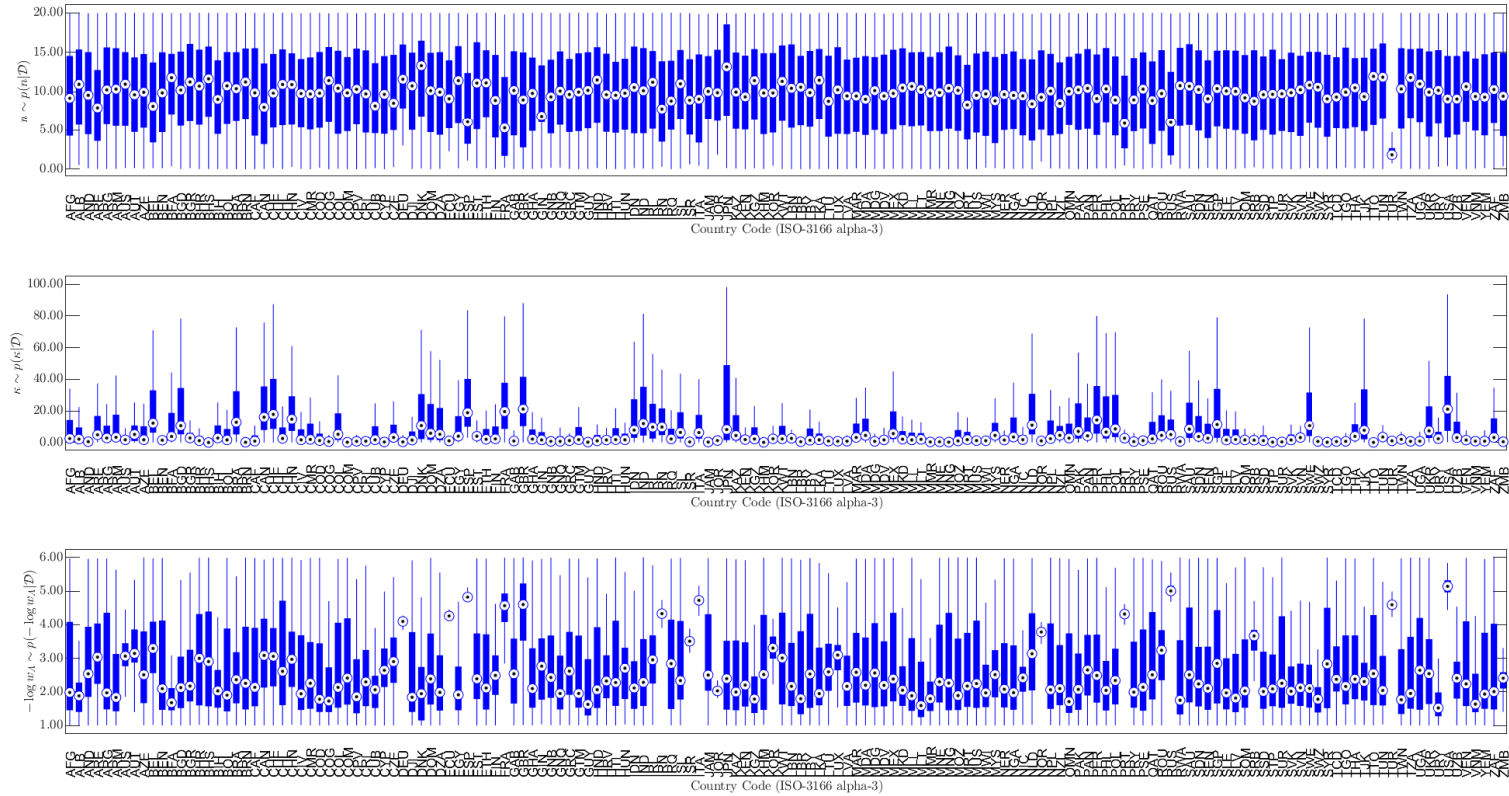

Figure 9: Box plots comparing marginal posterior distributions by country over the period 22 January–9 June 2020 for parameters  $n$  (top),  $\kappa$ , and  $-\log_{10} w_A$  (bottom).

## Appendix D Example posterior predictive distributions

Here we present examples posterior predictive distributions. In general, our model tends to smooth over sudden spikes in daily reported cases, recoveries and fatalities.

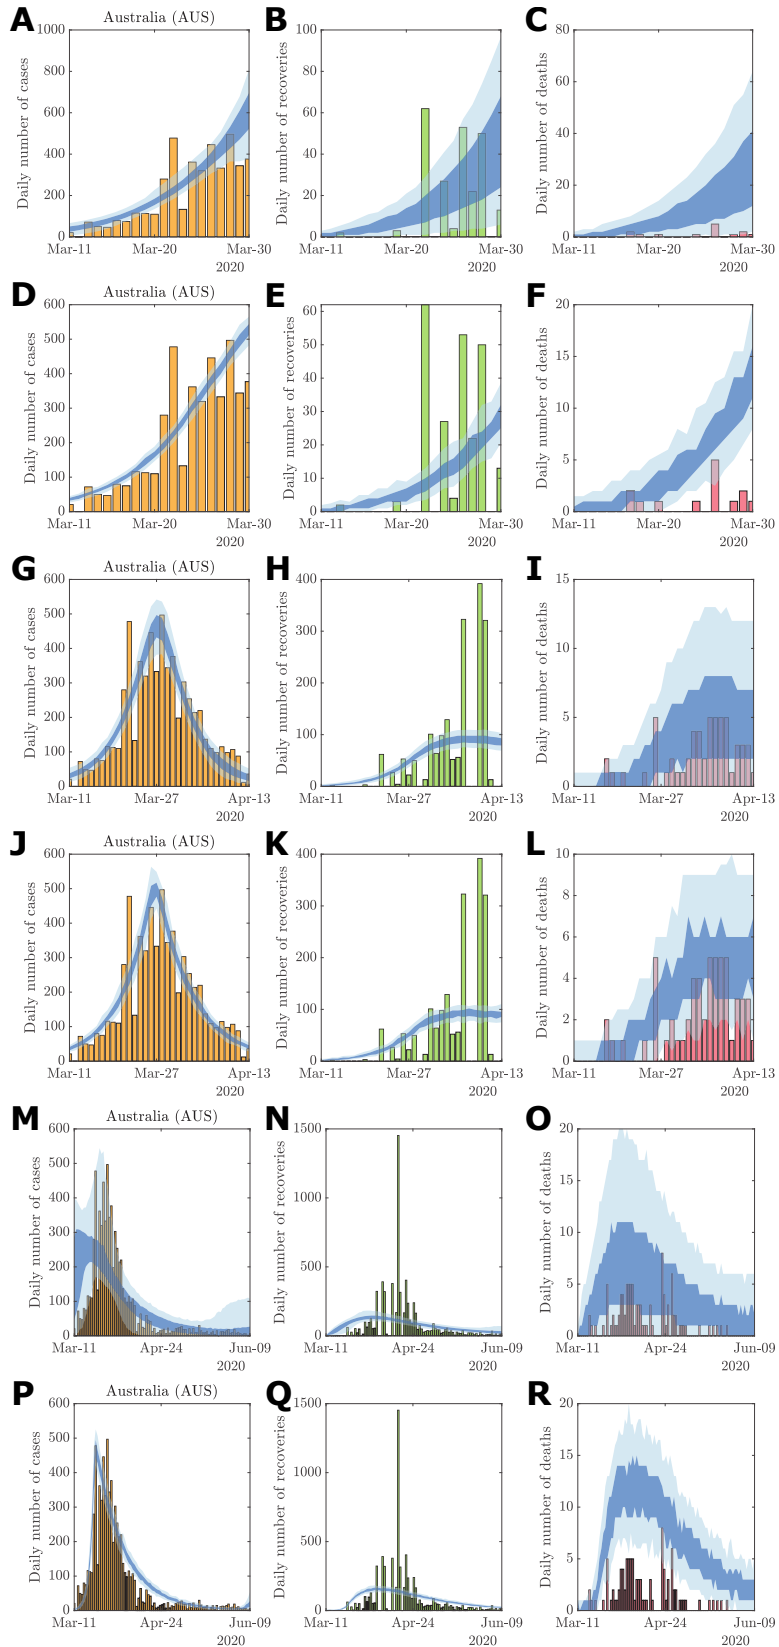

Figure 10: Full posterior predictive distributions for Australia over the periods (A)–(C) 22 January–30 March, (G)–(I) 22 January–13 April, and (M)–(O) 22 January–9 June, are compared with model fit using the parameter point estimate for periods (D)–(F) 22 January–30 March, (J)–(L) 22 January–13 April, and (P)–(R) 22 January–9 June. Vertical bars indicate daily reported cases (yellow), recoveries (green) and deaths (red). The 50% (dark shaded region) and 95% credible intervals (light shaded region) of the posterior predictive distributions are plotted against the observational data.

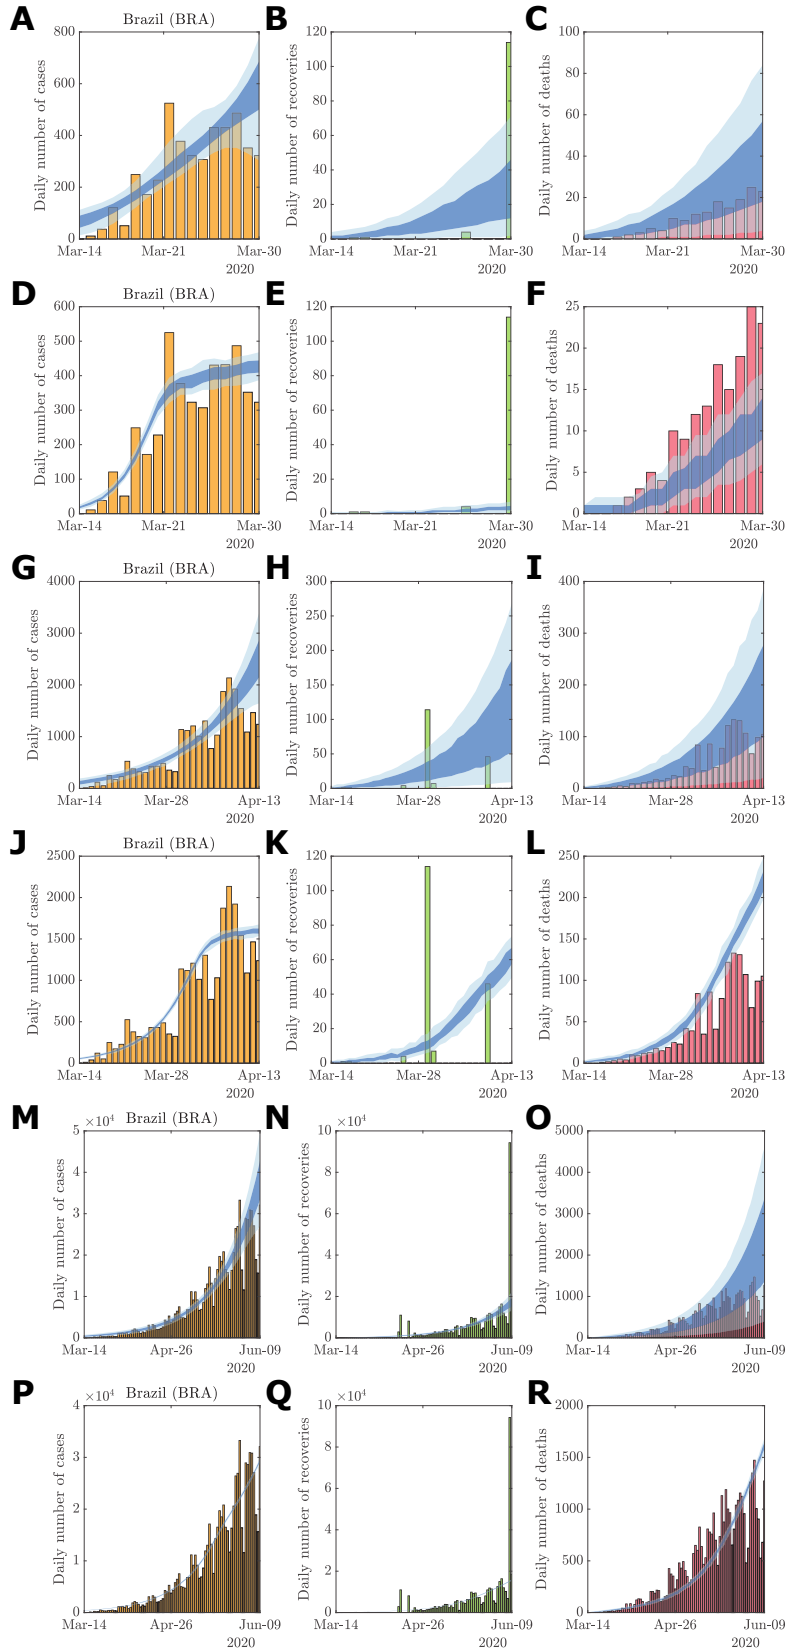

Figure 11: Full posterior predictive distributions for Brazil over the periods (A)–(C) 22 January–30 March, (G)–(I) 22 January–13 April, and (M)–(O) 22 January–9 June, are compared with model fit using the parameter point estimate for periods (D)–(F) 22 January–30 March, (J)–(L) 22 January–13 April, and (P)–(R) 22 January–9 June. Vertical bars indicate daily reported cases (yellow), recoveries (green) and deaths (red). The 50% (dark shaded region) and 95% credible intervals (light shaded region) of the posterior predictive distributions are plotted against the observational data.

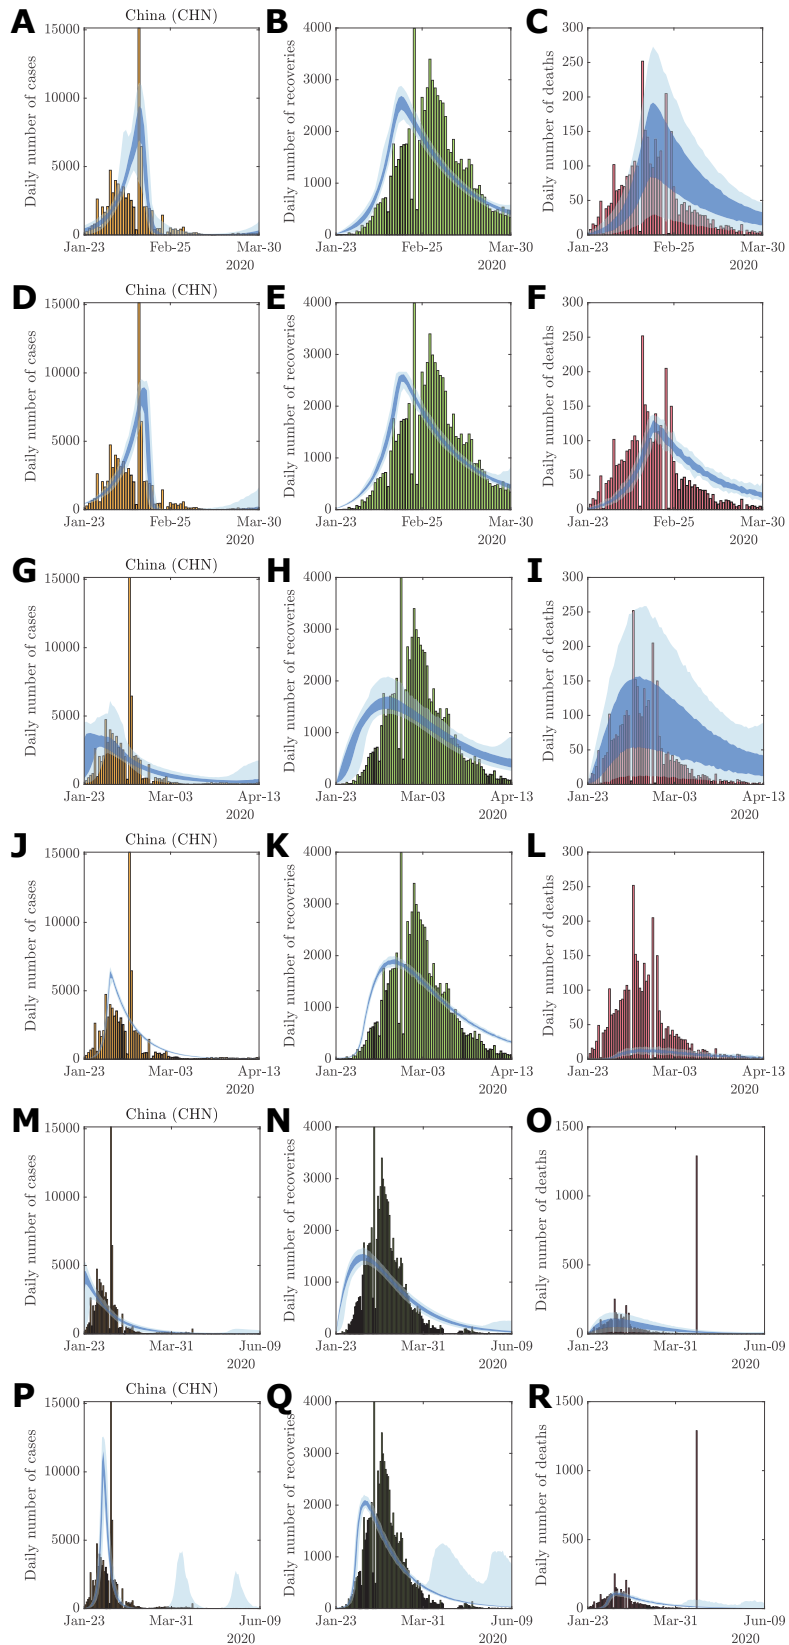

Figure 12: Full posterior predictive distributions for China over the periods (A)–(C) 22 January–30 March, (G)–(I) 22 January–13 April, and (M)–(O) 22 January–9 June, are compared with model fit using the parameter point estimate for periods (D)–(F) 22 January–30 March, (J)–(L) 22 January–13 April, and (P)–(R) 22 January–9 June. Vertical bars indicate daily reported cases (yellow), recoveries (green) and deaths (red). The 50% (dark shaded region) and 95% credible intervals (light shaded region) of the posterior predictive distributions are plotted against the observational data.



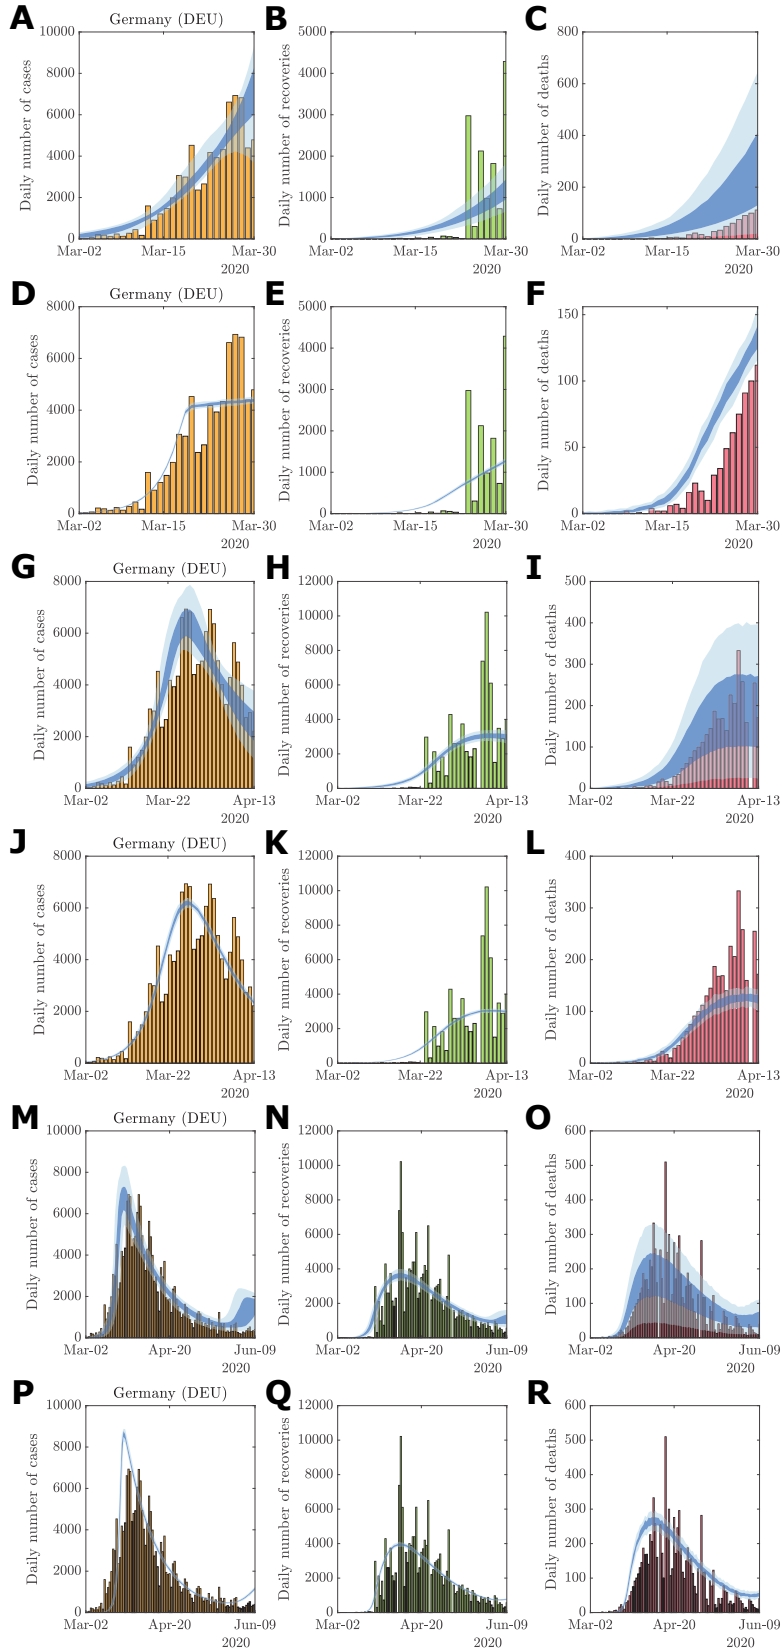

Figure 13: Full posterior predictive distributions for Germany over the periods (A)–(C) 22 January–30 March, (G)–(I) 22 January–13 April, and (M)–(O) 22 January–9 June, are compared with model fit using the parameter point estimate for periods (D)–(F) 22 January–30 March, (J)–(L) 22 January–13 April, and (P)–(R) 22 January–9 June. Vertical bars indicate daily reported cases (yellow), recoveries (green) and deaths (red). The 50% (dark shaded region) and 95% credible intervals (light shaded region) of the posterior predictive distributions are plotted against the observational data.

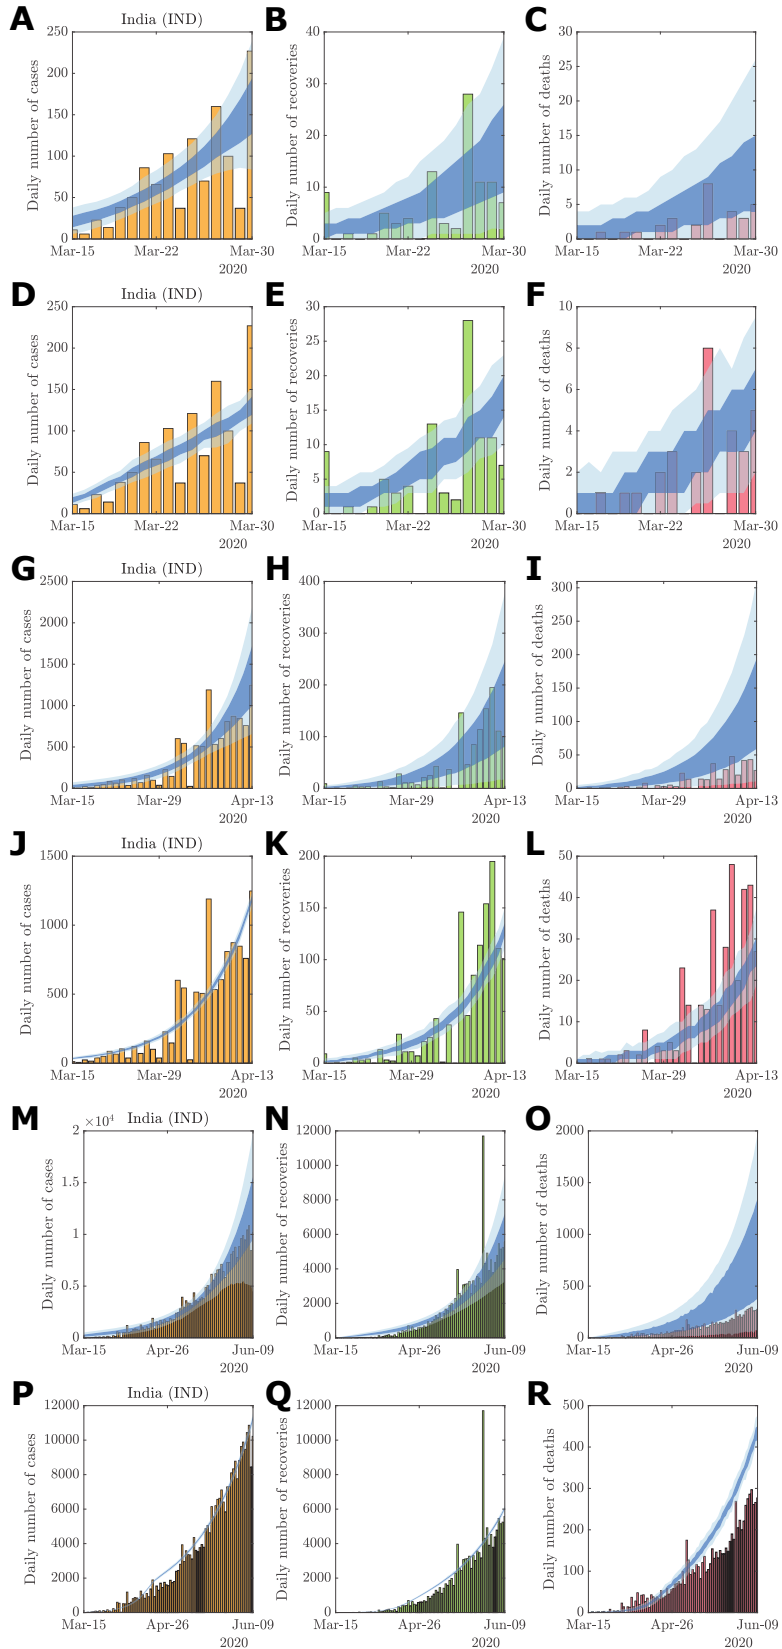

Figure 14: Full posterior predictive distributions for India over the periods (A)–(C) 22 January–30 March, (G)–(I) 22 January–13 April, and (M)–(O) 22 January–9 June, are compared with model fit using the parameter point estimate for periods (D)–(F) 22 January–30 March, (J)–(L) 22 January–13 April, and (P)–(R) 22 January–9 June. Vertical bars indicate daily reported cases (yellow), recoveries (green) and deaths (red). The 50% (dark shaded region) and 95% credible intervals (light shaded region) of the posterior predictive distributions are plotted against the observational data.

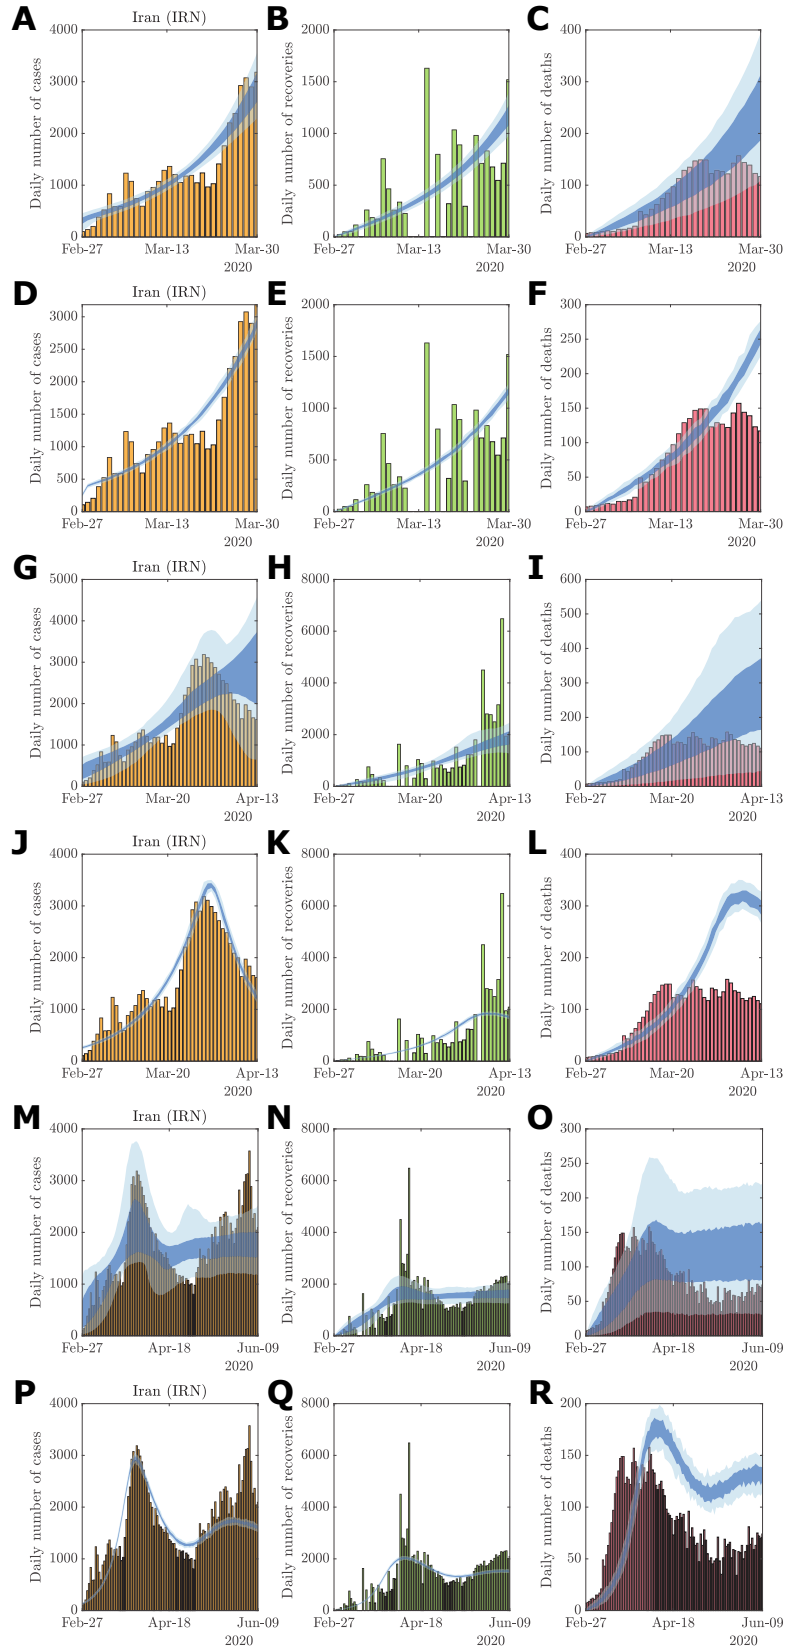

Figure 15: Full posterior predictive distributions for Iran over the periods (A)–(C) 22 January–30 March, (G)–(I) 22 January–13 April, and (M)–(O) 22 January–9 June, are compared with model fit using the parameter point estimate for periods (D)–(F) 22 January–30 March, (J)–(L) 22 January–13 April, and (P)–(R) 22 January–9 June. Vertical bars indicate daily reported cases (yellow), recoveries (green) and deaths (red). The 50% (dark shaded region) and 95% credible intervals (light shaded region) of the posterior predictive distributions are plotted against the observational data.

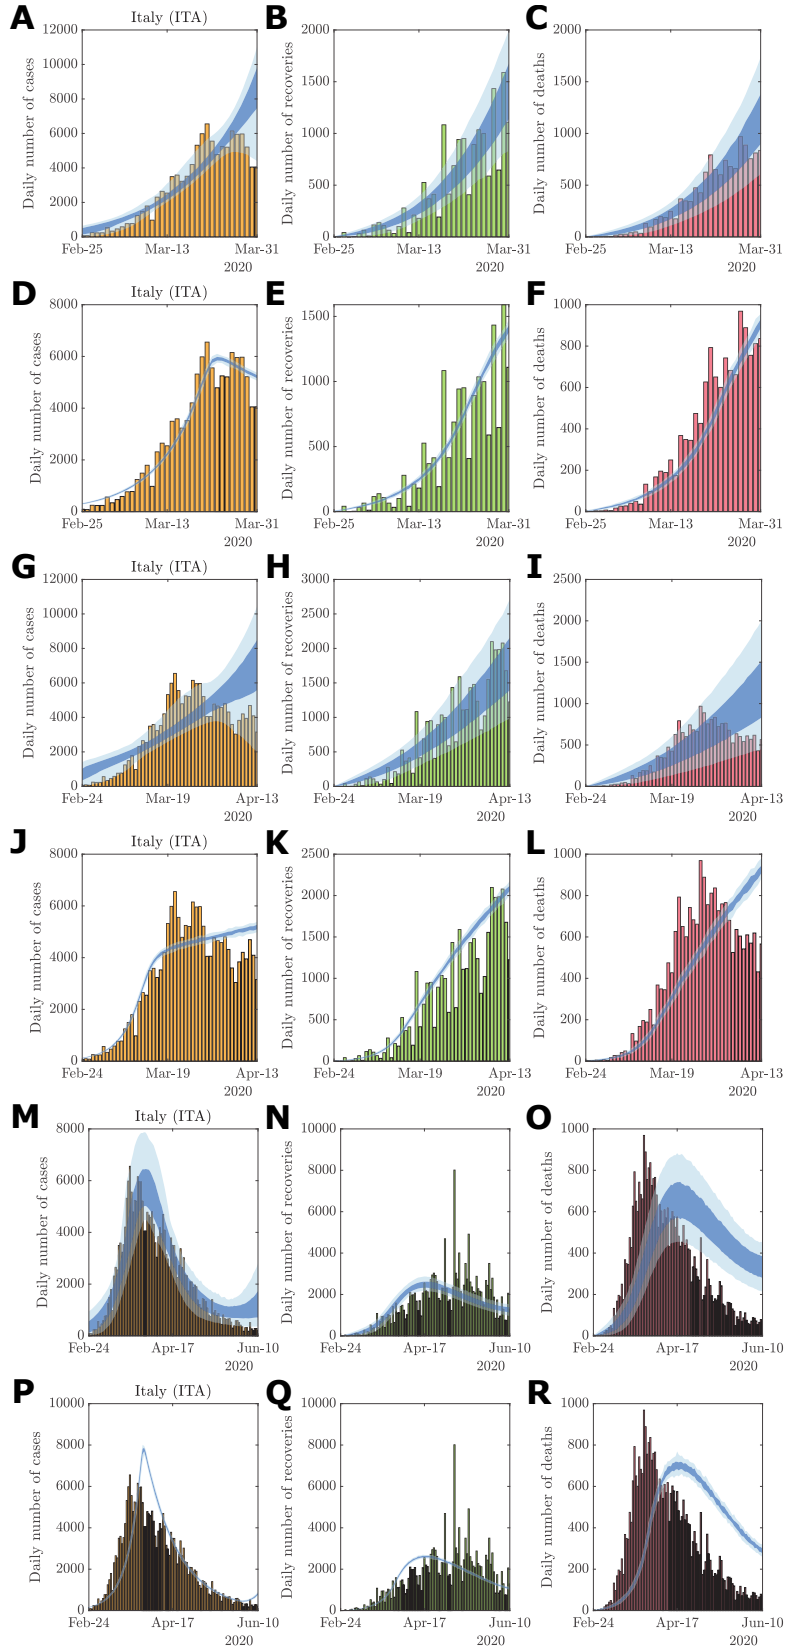

Figure 16: Full posterior predictive distributions for Italy over the periods (A)–(C) 22 January–30 March, (G)–(I) 22 January–13 April, and (M)–(O) 22 January–9 June, are compared with model fit using the parameter point estimate for periods (D)–(F) 22 January–30 March, (J)–(L) 22 January–13 April, and (P)–(R) 22 January–9 June. Vertical bars indicate daily reported cases (yellow), recoveries (green) and deaths (red). The 50% (dark shaded region) and 95% credible intervals (light shaded region) of the posterior predictive distributions are plotted against the observational data.

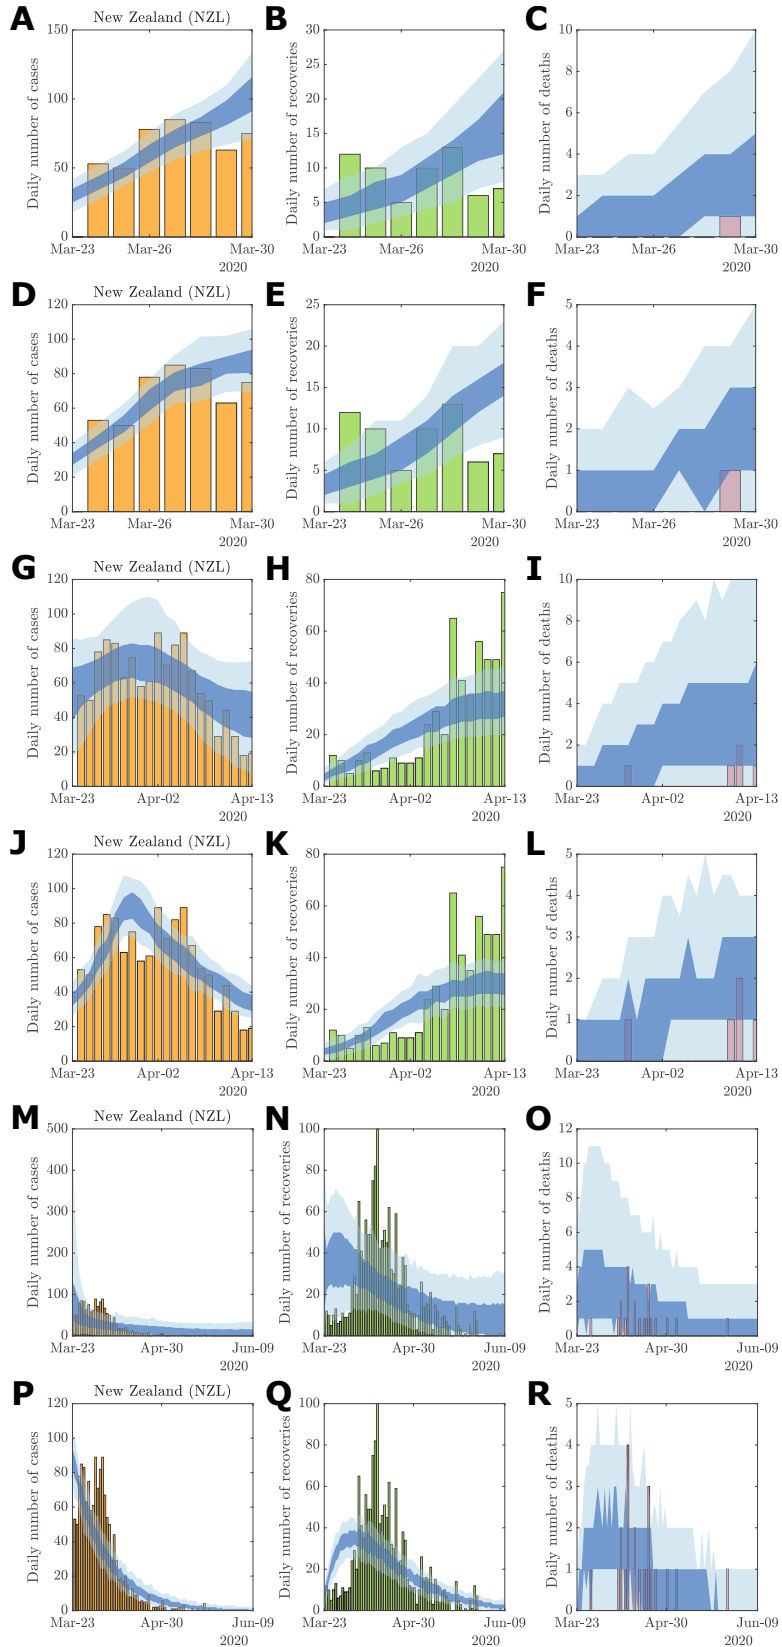

Figure 17: Full posterior predictive distributions for New Zealand over the periods (A)–(C) 22 January–30 March, (G)–(I) 22 January–13 April, and (M)–(O) 22 January–9 June, are compared with model fit using the parameter point estimate for periods (D)–(F) 22 January–30 March, (J)–(L) 22 January–13 April, and (P)–(R) 22 January–9 June. Vertical bars indicate daily reported cases (yellow), recoveries (green) and deaths (red). The 50% (dark shaded region) and 95% credible intervals (light shaded region) of the posterior predictive distributions are plotted against the observational data.

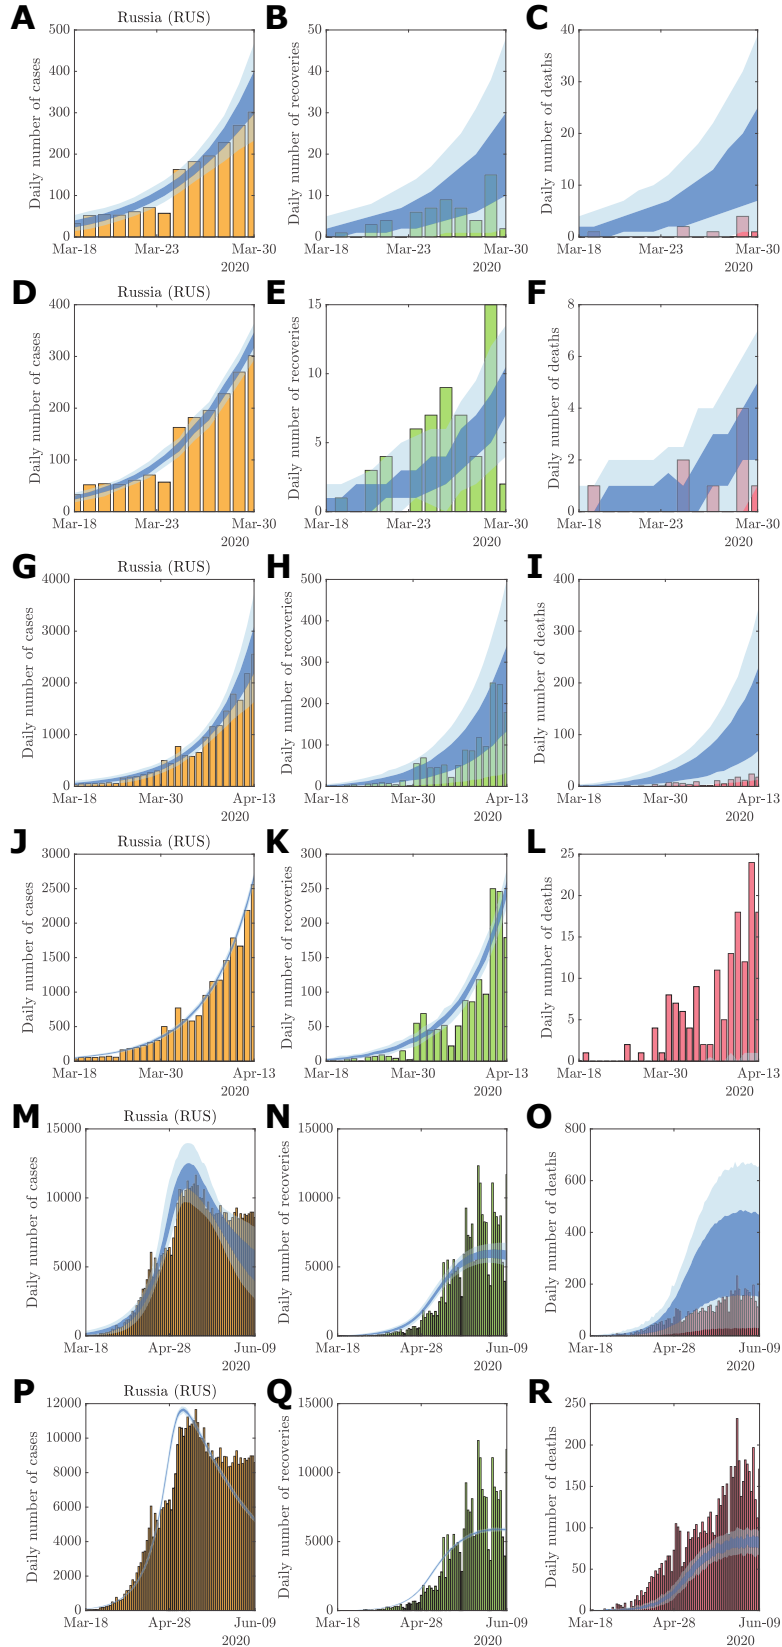

Figure 18: Full posterior predictive distributions for Russia over the periods (A)–(C) 22 January–30 March, (G)–(I) 22 January–13 April, and (M)–(O) 22 January–9 June, are compared with model fit using the parameter point estimate for periods (D)–(F) 22 January–30 March, (J)–(L) 22 January–13 April, and (P)–(R) 22 January–9 June. Vertical bars indicate daily reported cases (yellow), recoveries (green) and deaths (red). The 50% (dark shaded region) and 95% credible intervals (light shaded region) of the posterior predictive distributions are plotted against the observational data.

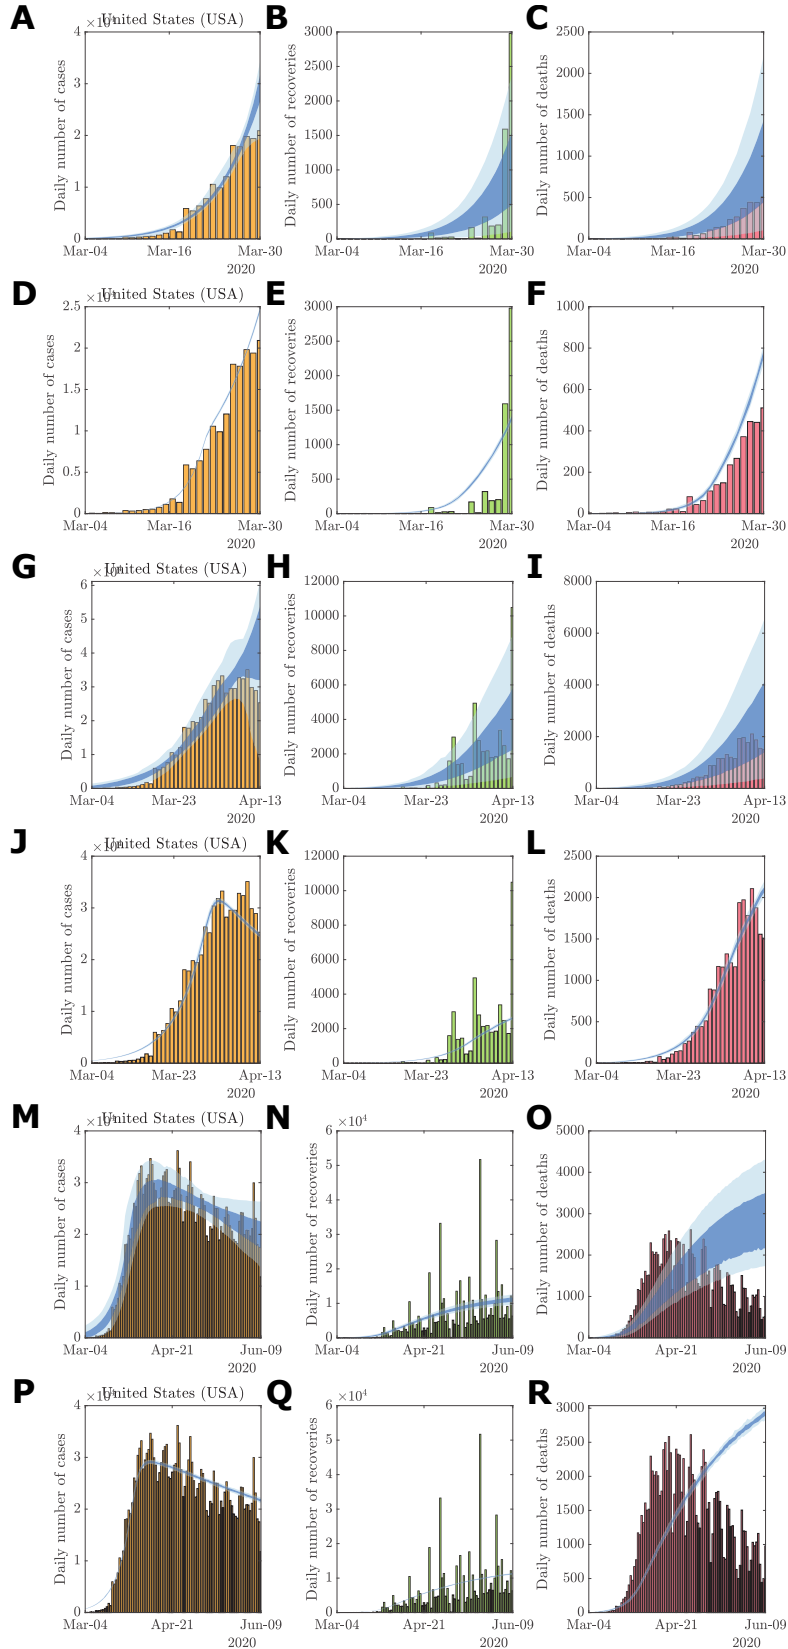

Figure 19: Full posterior predictive distributions for the United States over the periods (A)–(C) 22 January–30 March, (G)–(I) 22 January–13 April, and (M)–(O) 22 January–9 June, are compared with model fit using the parameter point estimate for periods (D)–(F) 22 January–30 March, (J)–(L) 22 January–13 April, and (P)–(R) 22 January–9 June. Vertical bars indicate daily reported cases (yellow), recoveries (green) and deaths (red). The 50% (dark shaded region) and 95% credible intervals (light shaded region) of the posterior predictive distributions are plotted against the observational data.

## Appendix E Sensitivity analysis

We performed a sensitivity analysis of our approach using the full response function  $U(A_t, R_t, D_t) = w_A A_t + w_R R_t + w_D D_t$  compared with our reduced model used in the analysis by setting  $w_R = w_D = 0$ . Overall, the resulting distribution of point estimates and correlation coefficients did not change substantially (Compare Fig. 20 with Fig. 21). We conclude that a community response that is based on active case numbers is a sufficient first order approximation for broad global comparison.

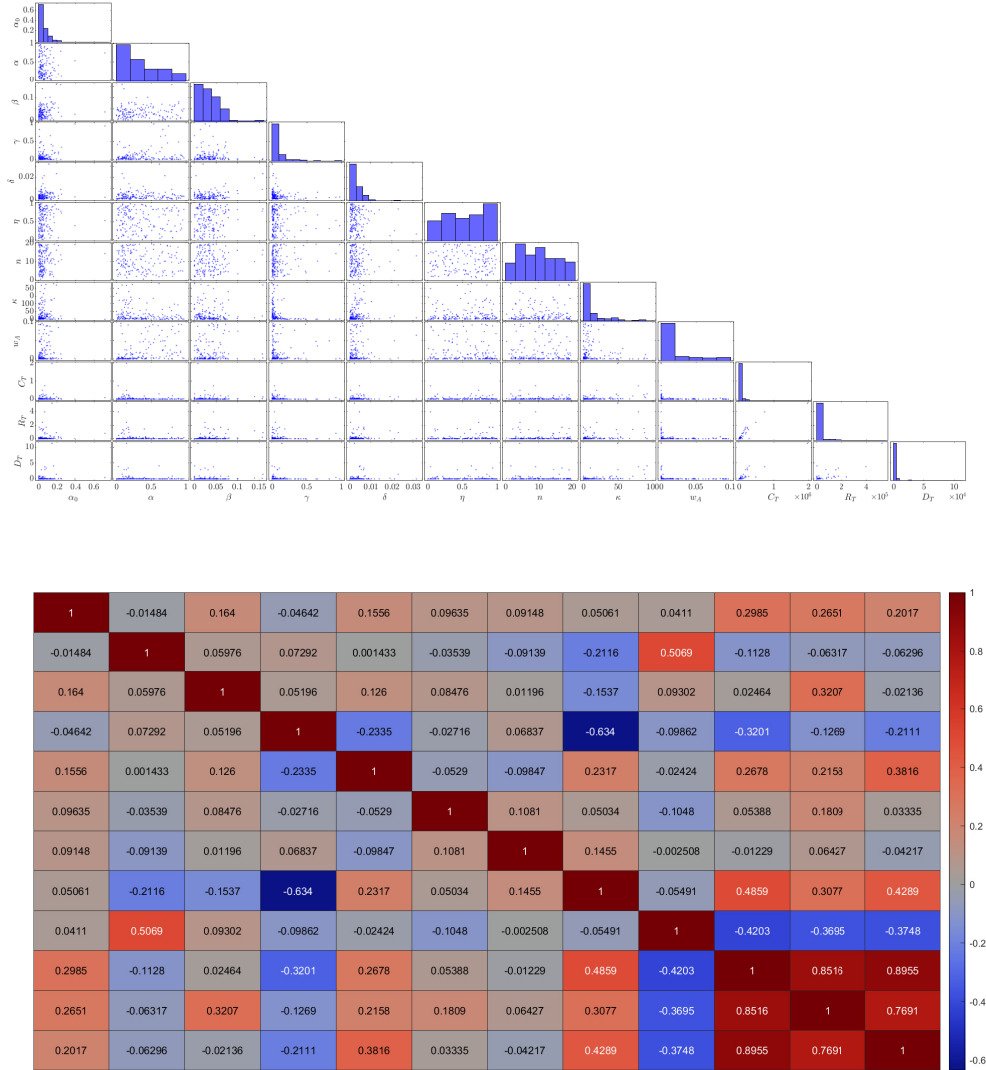

Figure 20: (top) Distributions of model parameter point using reduced model (that is  $w_R = w_D = 0$ ) estimates along with observed cumulative confirmed cases  $C_T$ , recoveries  $R_T$  and deaths  $D_T$  at  $T = 9$  June. (bottom) Spearman correlation coefficients between each point estimate and observed case numbers with the sign and strength of the correlation indicated by the colour-map (positive correlations in red and negative correlations in blue).



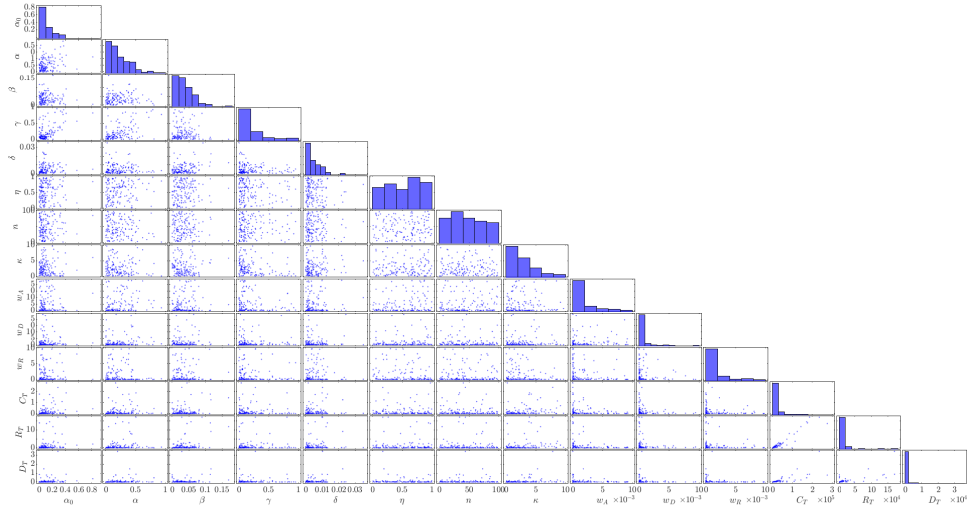

|           |         |           |           |          |          |           |          |           |          |          |          |          |           |
|-----------|---------|-----------|-----------|----------|----------|-----------|----------|-----------|----------|----------|----------|----------|-----------|
| 1         | 0.2036  | 0.01995   | 0.4145    | 0.203    | 0.06655  | -0.009085 | -0.09478 | 0.06641   | 0.1175   | 0.004972 | 0.3821   | 0.397    | 0.4293    |
| 0.2036    | 1       | 0.1113    | 0.4189    | 0.04359  | 0.0945   | -0.1016   | -0.1488  | 0.244     | 0.04437  | -0.1094  | 0.2741   | 0.3559   | 0.3291    |
| 0.01995   | 0.1113  | 1         | -0.02119  | 0.2704   | 0.1042   | -0.06701  | -0.103   | -0.007271 | -0.07406 | -0.03854 | 0.07179  | 0.36     | 0.06233   |
| 0.4145    | 0.4189  | -0.02119  | 1         | -0.02815 | -0.07984 | 0.06125   | -0.3889  | -0.1294   | -0.08832 | -0.1098  | -0.1105  | 0.07928  | -0.002496 |
| 0.203     | 0.04359 | 0.2704    | -0.02815  | 1        | -0.09056 | 0.004724  | 0.05115  | -0.02101  | -0.05975 | -0.02274 | 0.1807   | 0.1893   | 0.2713    |
| 0.06655   | 0.0945  | 0.1042    | -0.07984  | -0.09056 | 1        | 0.02577   | 0.03268  | 0.1154    | 0.06108  | -0.1995  | 0.03033  | 0.03449  | -0.01501  |
| -0.009085 | -0.1016 | -0.06701  | 0.06125   | 0.004724 | 0.02577  | 1         | -0.02124 | -0.01336  | -0.01448 | -0.08805 | -0.07312 | -0.3733  | -0.02956  |
| -0.09478  | -0.1488 | -0.103    | -0.3889   | 0.05115  | 0.03268  | -0.02124  | 1        | -0.01758  | 0.02238  | -0.1341  | 0.3559   | 0.2504   | 0.2666    |
| 0.06641   | 0.244   | -0.007271 | -0.1294   | -0.02101 | 0.1154   | -0.01336  | -0.01758 | 1         | 0.1496   | -0.1226  | -0.1008  | -0.1108  | -0.03767  |
| 0.1175    | 0.04437 | -0.07406  | -0.08832  | -0.05975 | 0.06108  | -0.01448  | 0.02238  | 0.1496    | 1        | -0.05233 | 0.02104  | -0.01076 | 0.07796   |
| 0.004972  | -0.1094 | -0.03854  | -0.1098   | -0.02274 | -0.1995  | -0.08805  | -0.1341  | -0.1226   | -0.05233 | 1        | -0.05565 | -0.3452  | -0.1026   |
| 0.3821    | 0.2741  | 0.07179   | -0.1105   | 0.1807   | 0.03033  | -0.07312  | 0.3559   | -0.1008   | 0.02104  | -0.05565 | 1        | 0.8345   | 0.875     |
| 0.397     | 0.3559  | 0.36      | 0.07928   | 0.1893   | 0.03449  | -0.0733   | 0.2504   | -0.1108   | -0.01076 | -0.0452  | 0.8345   | 1        | 0.7415    |
| 0.4293    | 0.3291  | 0.06233   | -0.002496 | 0.2713   | -0.01501 | -0.02956  | 0.2666   | -0.03767  | 0.07796  | -0.1026  | 0.875    | 0.7415   | 1         |

Figure 21: (top) Distributions of model parameter point using full model estimates along with observed cumulative confirmed cases  $C_T$ , recoveries  $R_T$  and deaths  $D_T$  at  $T = 9$  June. (bottom) Spearman correlation coefficients between each point estimate and observed case numbers with the sign and strength of the correlation indicated by the colour-map (positive correlations in red and negative correlations in blue).

## References

- [1] P. Del Moral, A. Doucet, and A. Jasra. Sequential Monte Carlo samplers. *Journal of the Royal Statistical Society: Series B (Statistical Methodology)*, 68:411–436, 2006.
- [2] C. C. Drovandi and A. N. Pettitt. Estimation of parameters for macroparasite population evolution using approximate Bayesian computation. *Biometrics*, 67(1):225–233, 2011.
- [3] M. A. Gibson and J. Bruck. Efficient exact stochastic simulation of chemical systems with many species and many channels. *The Journal of Physical Chemistry*, 104:1876–1889, 2000.
- [4] D. T. Gillespie. Exact stochastic simulation of coupled chemical reactions. *The Journal of Physical Chemistry*, 81:2340–2361, 1977.
- [5] D. T. Gillespie. Approximate accelerated stochastic simulation of chemically reacting systems. *The Journal of Chemical Physics*, 115(4):1716–1733, 2001.
- [6] T. G. Kurtz. The relationship between stochastic and deterministic models for chemical reactions. *The Journal of Chemical Physics*, 57(7):2976–2978, 1972.
- [7] S. A. Sisson, Y. Fan, and M. M. Tanaka. Sequential Monte Carlo without likelihoods. *Proceedings of the National Academy of Sciences of the United States of America*, 104:1760–1765, 2007.
- [8] S. A. Sisson, Y. Fan, and M. Beaumont. *Handbook of Approximate Bayesian Computation*. Chapman & Hall/CRC, 1st edition, 2018.
- [9] M. Sunnåker, A. G. Busetto, E. Numminen, J. Corander, M. Foll, and C. Dessimoz. Approximate Bayesian computation. *PLOS Computational Biology*, 9:e1002803, 2013.
- [10] D. J. Warne, R. E. Baker, and M. J. Simpson. Simulation and inference algorithms for stochastic biochemical reaction networks: from basic concepts to state-of-the-art. *Journal of the Royal Society Interface* 16:20180943, 2019.
